# Supplementary material for: E. coli RNase I exhibits a strong Ca2+-dependent inherent double-stranded RNase activity
Source: PubMed Central journal article supplement — Nucleic Acids Res. 2021 Apr 22;49(9):5265–77. doi: 10.1093/nar/gkab284 (PMC8136782; doi:10.1093/nar/gkab284), 2021-04-22
Supplement: gkab284_supplemental_file.pdf [file gkab284_supplemental_file.pdf]

***E. coli* RNase I exhibits a strong Ca<sup>2+</sup>-dependent inherent double-stranded RNase activity**

Sebastian Grünberg, Baptiste Coxam, Tien-Hao Chen, Nan Dai, Lana Saleh, Ivan R. Corrêa Jr., Nicole M. Nichols\*, Erbay Yigit\*

**Supplementary Data**

## Supplementary Experimental Procedures

### Differential scanning fluorimetry

45  $\mu\text{M}$  of the dsRNA substrate was incubated in buffer A as described in “Enzymatic assays”. The dsRNA was then diluted on ice to 0.5  $\mu\text{M}$  in 50  $\mu\text{L}$  buffer A supplemented with 1 mM indicated cation and a 400-fold dilution of Quant-iT RiboGreen (Thermo Fisher Scientific). DSF assays were performed on a CFX96 Touch Real-Time PCR Detection System (Bio-Rad) from 20  $^{\circ}\text{C}$  to 95  $^{\circ}\text{C}$  at a temperature ramp of 1  $^{\circ}\text{C}$  per 30 seconds. After the fluorescent signal was normalized, the melting temperature was determined as the maxima of negative first derivative from four independent measurements (1).

### DNase contamination assays

0.5  $\mu\text{M}$  DNA oligonucleotides (either 3'- or 5'-end FAM labeled) were incubated with 6.7  $\mu\text{M}$  RNase I in buffer A in the presence or absence of 4 mM  $\text{CaCl}_2$  at 37  $^{\circ}\text{C}$  for 15 minutes. The reactions were quenched by the addition of 0.8 U Proteinase K (NEB P8107) on ice, followed by 15 min incubation at 37  $^{\circ}\text{C}$ . After diluting the samples with nuclease free water to appropriate concentrations, the oligonucleotides were separated using capillary electrophoresis and visualized using a 3730xl Genetic Analyzer (Applied Biosystems) as described (2). The fluorescent fractions were analyzed by Peak Scanner software version 1.0 (Applied Biosystems).

### Enzymatic assays to determine RNase I catalytic efficiency

With the exception of the following changes, the enzymatic assays were performed essentially as described in the Materials & Methods section of the main text. RNase I was incubated with dsRNA at enzyme to substrate (E:S) ratios of 1/10, 1/20, 1/40, 1/80, and 1/100 in the absence of  $\text{Ca}^{2+}$ . When  $\text{Ca}^{2+}$  was present, these ratios were 1/250, 1/500, 1/750, and 1/1,250 to accommodate for the significantly higher activity. E:S ratios tested in ssRNA reactions in the absence and presence of  $\text{Ca}^{2+}$  were 1/1000, 1/1,500, 1/3,000, 1/4,000, 1/5,000. A master mix was assembled on ice, RNase I being the last component added, and subsequently aliquoted into separate tubes. The tube for the 0-timepoint contained 1  $\mu\text{L}$  of Proteinase K to immediately stop the reaction. The remaining tubes were transferred to 37  $^{\circ}\text{C}$  and the reaction stopped by addition of 1  $\mu\text{L}$  Proteinase K at the indicated timepoints. After 10 min of Proteinase K treatment at 37  $^{\circ}\text{C}$ , dsRNA samples were analyzed on 10% non-denaturing gels as described in Materials & Methods, while ssRNA samples were loaded onto 15% denaturing polyacrylamide TBE-urea gels and run in 1x TBE buffer for 45 min at 180V. The gels were stained and visualized as described in Methods & Materials. The reduction of the full-length RNA substrate band of two to three independent replicas per experiment was quantified using ImageQuant TL software and the kinetic traces were generated using KaleidaGraph software (Reading, PA). All traces were fit to a single exponential equation except for dsRNA no  $\text{Ca}^{2+}$ , which was fit to a double exponential equation. An initial rate for each condition was derived by multiplying the amplitude and the observed rate constant. This in turn was plotted against substrate concentration and fit to a Michaelis-Menten equation. An accurate derivation of the Michaelis constant ( $K_M$ ) for each condition was not possible due to the fact that the data points fell on the saturating part of the

curve due to experimental limitations dictated by the detection limits of the in-gel staining of the cleavage products. Instead, we estimated  $K_M$  to be roughly 150 nM for all conditions allowing us to derive the maximum rate ( $v_{max}$ ) as described in Table S4. The turnover number ( $k_{cat}$ ) described as  $v_{max}/[Enzyme]$  is used to compare performance of RNase I on the various substrates.

1. Silvers, R., Keller, H., Schwalbe, H. and Hengesbach, M. (2015) Differential scanning fluorimetry for monitoring RNA stability. *Chembiochem*, **16**, 1109-1114.
2. Greenough, L., Schermerhorn, K.M., Mazzola, L., Bybee, J., Rivizzigno, D., Cantin, E., Slatko, B.E. and Gardner, A.F. (2016) Adapting capillary gel electrophoresis as a sensitive, high-throughput method to accelerate characterization of nucleic acid metabolic enzymes. *Nucleic Acids Res*, **44**, e15.

## Supplementary Figure and Table legends

**Figure S1. Protein gel of all RNase I variants used in this study.** 5  $\mu$ l of a 1:10 dilution of each protein stock were ran on a 10-20% Tris-Glycine SDS gel and stained with SimplyBlue Safe Stain. NEB Color Prestained Protein Standard P7712 was used as marker. Asterisks indicate endogenous *E. coli* MBP and degradation products.

**Figure S2. Catalytic efficiency of RNase I on dsRNA substrates.** (A)  $6.7 \times 10^{-3}$   $\mu$ M of RNase I was incubated with various concentrations of dsRNA starting at 0.067  $\mu$ M (top) to 0.67  $\mu$ M (bottom) in the absence of  $CaCl_2$ . The digestion reaction was quenched at the timepoints indicated above the respective lanes on the gel. (B) Timepoints were taken as in (A) with  $1.34 \times 10^{-3}$   $\mu$ M RNase I and dsRNA concentrations starting at 0.335  $\mu$ M (top) to 1.675  $\mu$ M (bottom). (C) Michaelis-Menten plots showing effect of  $Ca^{2+}$  on the activity of RNase I in the presence of dsRNA substrate.

**Figure S3. Cleavage pattern for the digestion of a FAM-labeled 33mer dsRNA substrate (2 nt 3' overhangs) with RNase I.** MS results showing the location of the cleavage and the relative abundance of the resulting fragment for reactions containing 0.5  $\mu$ M dsRNA substrate and  $1.34 \times 10^{-3}$   $\mu$ M RNase I without (A) or with  $Ca^{2+}$  (B). A representative example of cleavage products is shown in (C). Asterisks indicate the location of cleavage in this example. Blue bars represent uncleaved full-length (FL) oligonucleotides. Red bars represent cleaved products without a FAM label (sequence to left of the bar). Green bars represent cleaved products with a FAM label (sequence to right of the bar, including nucleotide under the bar).

**Figure S4. Calcium induced RNase I activity on dsRNA with blunt and DNA ends.** (A) A 31mer blunt-ended dsRNA digested with RNase I in the absence (lanes 1-9) or presence of  $CaCl_2$  (lanes 10-18). The reactions were carried under the standard assay conditions with 0.1  $\mu$ M substrate and enzyme concentrations as indicated above the lanes. Quantification of the uncleaved dsRNA substrate is shown in (C). (B) A 41mer blunt-ended dsDNA-RNA-DNA chimera digested with RNase I in the absence (lanes 1-8) or presence of  $CaCl_2$  (lanes 9-16). The blunt-ended DNA-RNA-DNA chimera featuring seven deoxyribonucleotides in each of the ends was chosen to protect against potential exoribonuclease activity. Quantification of uncleaved dsRNA substrate is shown in (D).

**Figure S5. RNase I binds but does not cleave DNA.** (A) Electrophoretic mobility shift assays of various concentrations of RNase I (as indicated above the gel) with either dsDNA (upper panel) or ssDNA (lower panel). Quantification of unbound RNA is shown in (B). (C) DNase activity assay. Single (left) and

double (right) stranded DNA incubated either with buffer A or RNase I, with or without CaCl<sub>2</sub>. The bars represent the percentage of uncleaved DNA substrate after incubation from two independent replicates.

**Figure S6. Cleavage pattern for digestion of blunt-ended dsRNA substrates with RNase I.** MS results showing the location of the cleavage and the relative abundance of the resulting fragment for reactions of 26mer (A) and 41mer (B) dsRNA substrates. Reactions in (A) were carried out with 0.67 μM RNase I without Ca<sup>2+</sup> (top) or 6.7x10<sup>-2</sup> μM RNase I with Ca<sup>2+</sup> (bottom). Reactions in (B) were carried out with 0.134 μM RNase I without Ca<sup>2+</sup> (top) or 1.34x10<sup>-2</sup> μM RNase I with Ca<sup>2+</sup> (bottom). Blue bars represent uncleaved full-length (FL) oligonucleotides. Red bars represent primary cleavage products (sequence to left of the bar). Yellow bars represent a secondary cleavage of the primary products leaving a 5'-OH (top strands), a 2',3'-cyclic phosphate (bottom strands, dark yellow), or 3'-phosphate (bottom strands, light yellow).

**Figure S7. Tagless RNase I variants require Ca<sup>2+</sup> to efficiently cleave dsRNA substrates.** (A) Various dilutions of two commercially available, tagless RNase I variants incubated with 0.1 μM of 33mer dsRNA substrate with 2 nt 3' overhangs. The asterisks highlight the uncleaved full-length dsRNA substrate. Reactions in lanes 7-12 contained 4 mM CaCl<sub>2</sub>. (B) Quantification of the gel bands shown in (A).

**Figure S8. Catalytic efficiency of RNase I on ssRNA.** 6.7x10<sup>-4</sup> μM of RNase I was incubated with various concentrations of a 33 nt ssRNA from 0.67 μM (top) to 3.35 μM (bottom). Reactions in (A) were incubated in the absence and reactions in (B) in the presence of 4 mM CaCl<sub>2</sub>. Reactions were quenched by the addition of Proteinase K at the timepoints indicated above the respective lanes. The diamond indicates a potential primary cleavage product. (C) Michaelis-Menten plots showing effect of Ca<sup>2+</sup> on the activity of RNase I in the presence of ssRNA substrate.

**Figure S9. The presence of Ca<sup>2+</sup> does not make dsRNA more susceptible to digestion by single strand specific endoribonucleases.** (A) 0.1 μM dsRNA (upper panel) or ssRNA (lower panel) substrate cleaved with 10-fold decreasing concentrations of pancreatic RNase A, from 10 μM (lanes 2, 8) to 1x10<sup>-3</sup> μM (lanes 6, 12) either in the absence (lanes 1-6) or presence of 4 mM CaCl<sub>2</sub> (lanes 7-12). NE, no enzyme control. (B) Differential scanning fluorimetry was used to determine the stability of dsRNA in buffer, both in the absence and presence of divalent cations. The table shows the observed melting temperatures determined from three replicates. N.D, not determined due to no local maximum.

**Figure S10. The inhibitory effect of EDTA on RNase I dsRNase activity is concentration dependent.** (A) RNase I purified without DTT/EDTA was incubated with dsRNA in the absence (left panel) or presence (right panel) of 4 mM CaCl<sub>2</sub>. Either no, 0.5 mM, or 4 mM EDTA was added to the reactions as indicated below each gel. Quantification of uncleaved dsRNA substrate in the reactions containing 1.34x10<sup>-2</sup> μM RNase I in the absence of Ca<sup>2+</sup> is shown in (B). The asterisk marks the no enzyme control. EDTA barely affects cleavage of ssRNA by RNase I, regardless if Ca<sup>2+</sup> is present (C and D).

**Figure S11. Structural analysis of the RNase I Ca<sup>2+</sup> binding site and RNase I mutant function.** (A) The zoomed-in section of the Ca<sup>2+</sup> binding site in the crystal structure of RNase I (2PQX; Rodriguez et al., 2008) highlights the highly conserved amino acid residues that coordinate the Ca<sup>2+</sup>. RNase I<sub>D241L</sub> concentrations from 6.7 μM to 6.7x10<sup>-4</sup> μM incubated with 0.1 μM of a 31mer blunt-ended dsRNA substrate in the absence (B) or presence of 4 mM CaCl<sub>2</sub> (C). The relative amount of uncleaved full-length dsRNA substrate is shown in (D). (E) The distance between the Ca<sup>2+</sup> binding site and the catalytic center of RNase I is approximately 18 Å. Two β-strands (red) of the RNase I central β-sheet are either directly contacting residues that bind to Ca<sup>2+</sup> (β6 and the residues D264 and L265) or are in close proximity to the

Ca<sup>2+</sup> binding site ( $\beta$ 1 positioned directly upstream of the Q49 containing  $\alpha$ 1 helix (green)). Other  $\beta$ -strands are shown in orange.

**Figure S12. Deconvoluted ESI-MS spectra of 33mer dsRNA substrate (2 nt 3' overhangs) digested with RNase I.** Reactions were carried out with  $6.7 \times 10^{-2}$   $\mu$ M RNase I without Ca<sup>2+</sup> (A) or  $6.7 \times 10^{-3}$   $\mu$ M RNase I with Ca<sup>2+</sup> (B). The composition of each peak was determined by comparison with calculated monoisotopic mass. Output mass range of 7,000 to 11,000 Da. Monoisotopic masses corresponding to uncleaved full-length (FL) top and bottom strands are shown.

**Figure S13. Deconvoluted ESI-MS spectra of FAM-labeled 33mer dsRNA substrate (2 nt 3' overhangs) digested with RNase I.** Reactions were carried out with  $1.34 \times 10^{-3}$   $\mu$ M RNase I without (A) or with Ca<sup>2+</sup> (B). The composition of each peak was determined by comparison with calculated monoisotopic mass. Output mass range of 2,000 to 12,000 Da. Monoisotopic masses corresponding to uncleaved full-length (FL) top and bottom strands are shown.

**Figure S14. Deconvoluted ESI-MS spectra of 26mer dsRNA substrate (blunt ends) digested with RNase I.** Reactions were carried out with 0.67  $\mu$ M RNase I without Ca<sup>2+</sup> (A) or  $6.7 \times 10^{-2}$   $\mu$ M RNase I with Ca<sup>2+</sup> (B). The composition of each peak was determined by comparison with calculated monoisotopic mass. Output mass range of 5,000 to 9,000 Da. Monoisotopic masses corresponding to uncleaved full-length (FL) top and bottom strands are shown.

**Figure S15. Deconvoluted ESI-MS spectra of 41mer dsRNA substrate (blunt ends) digested with RNase I.** Reactions were carried out with 0.134  $\mu$ M RNase I without Ca<sup>2+</sup> (A) or  $1.34 \times 10^{-2}$   $\mu$ M RNase I with Ca<sup>2+</sup> (B). The composition of each peak was determined by comparison with calculated monoisotopic mass. Output mass range of 8,500 to 13,500 Da. Monoisotopic masses corresponding to uncleaved full-length (FL) top and bottom strands are shown.

**Figure S16. Deconvoluted ESI-MS spectra of 33mer dsRNA substrate (2 nt 3' overhangs) digested with RNase I in absence of DTT and EDTA.** Reactions were carried out with  $6.7 \times 10^{-3}$   $\mu$ M RNase I (–DTT/–EDTA) without (A) or with Ca<sup>2+</sup> (B). The composition of each peak was determined by comparison with calculated monoisotopic mass. Output mass range of 7,000 to 11,000 Da. Monoisotopic masses corresponding to uncleaved full-length (FL) top and bottom strands are shown.

**Table S1: A list of substrates used in this study.** Size, type, and chemical structure of the oligo ends are indicated in the table.

**Table S2. Assigned fragments based on ESI-MS analysis of 0.5  $\mu$ M 33mer dsRNA substrate (2 nt 3' overhangs) digested with RNase I.** (A) Without Ca<sup>2+</sup>. (B) With Ca<sup>2+</sup>. Calculated and found monoisotopic masses are shown. Mass errors are expressed in ppm. n.f., not found. >p, 2',3'-cyclic phosphate. "% Rel" is the relative signal strength compared to the highest peak, which is set to be 100%.

**Table S3. Assigned fragments based on ESI-MS analysis of 0.5  $\mu$ M 33mer dsRNA substrate (2 nt 3' overhangs) digested with RNase I purified in the absence of DTT and EDTA.** (A) Without Ca<sup>2+</sup>. (B) With Ca<sup>2+</sup>. Calculated and found monoisotopic masses are shown. Mass errors are expressed in ppm. n.f.,

not found. >p, 2',3'-cyclic phosphate. "% Rel" is the relative signal strength compared to the highest peak, which is set to be 100%.

**Table S4. Kinetic parameters for RNase I digestion of ds- and ssRNA substrates in the presence or absence of Ca<sup>2+</sup>.**

**Figure S1**

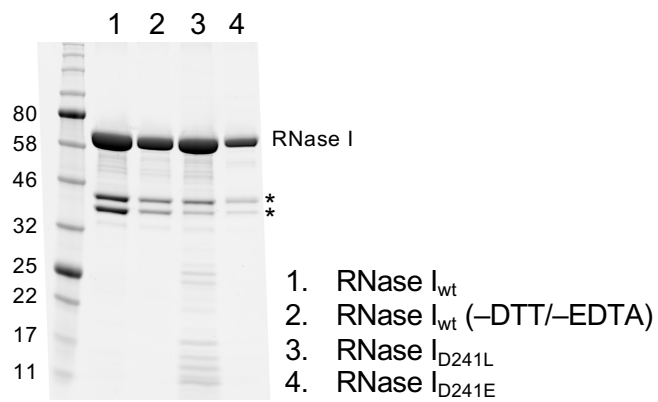

**Figure S2**

**A**

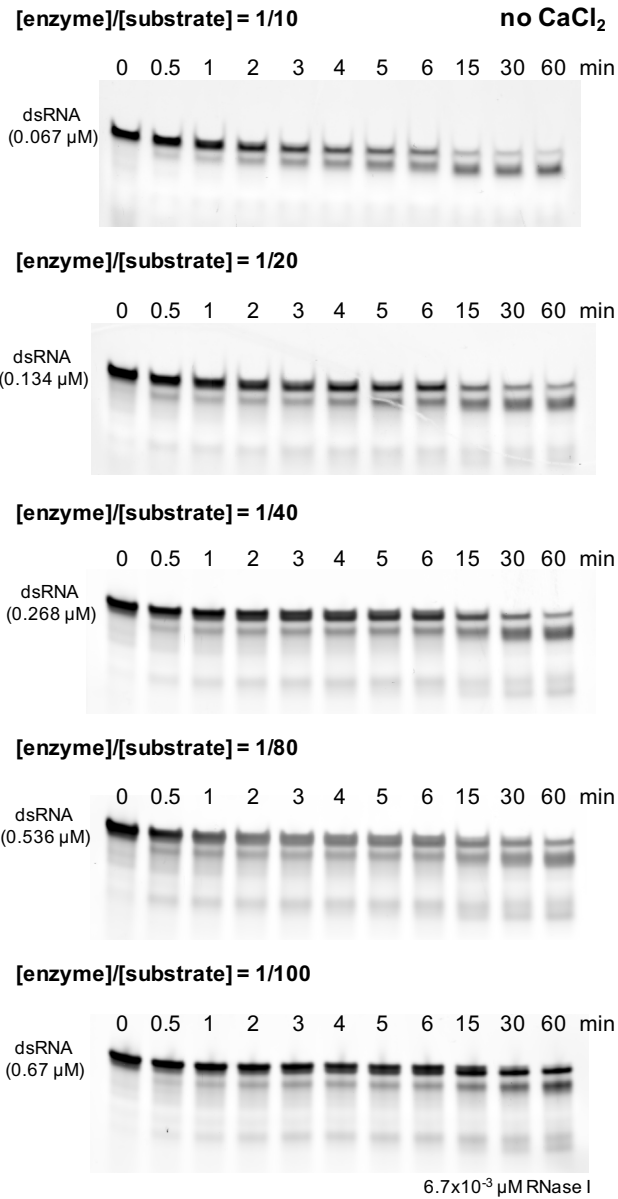

**B**

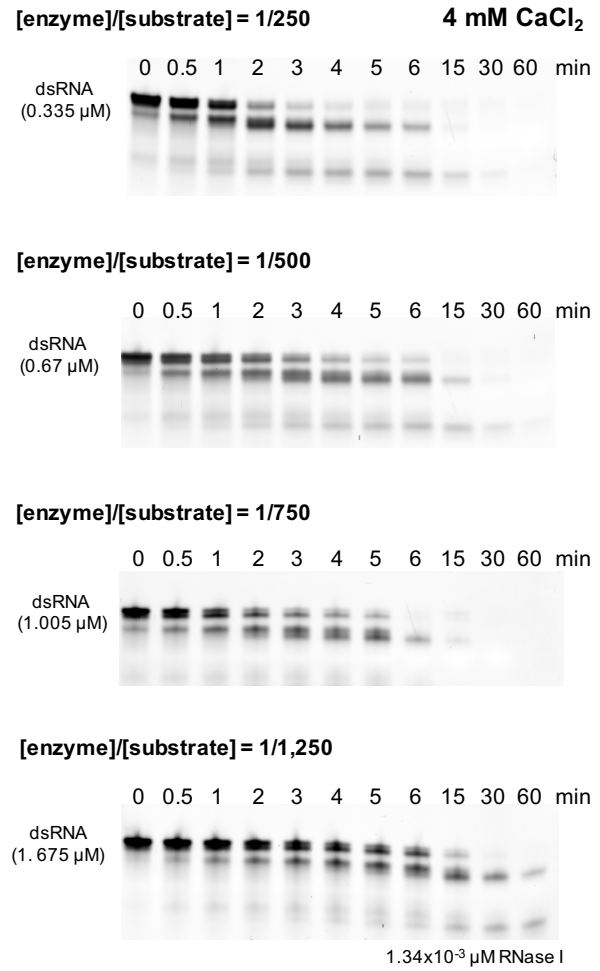

**C**

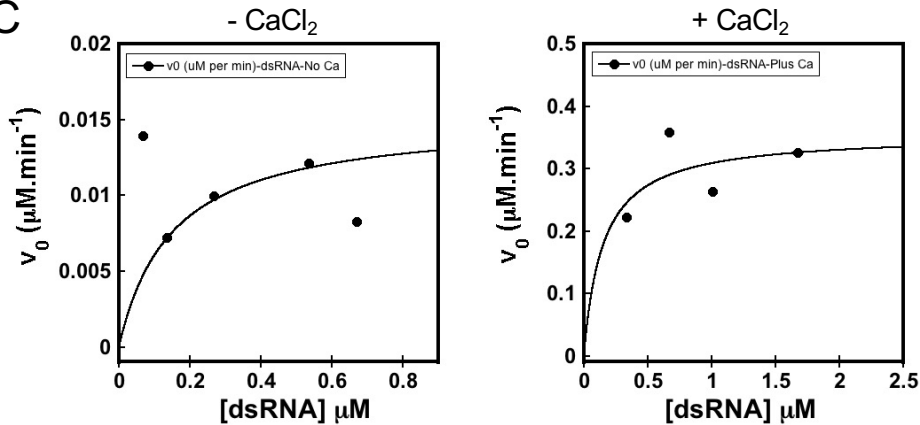



# Figure S3

**A**  $1.34 \times 10^{-3} \mu\text{M}$  RNase I<sub>wt</sub>, - CaCl<sub>2</sub>  
33 nt dsRNA

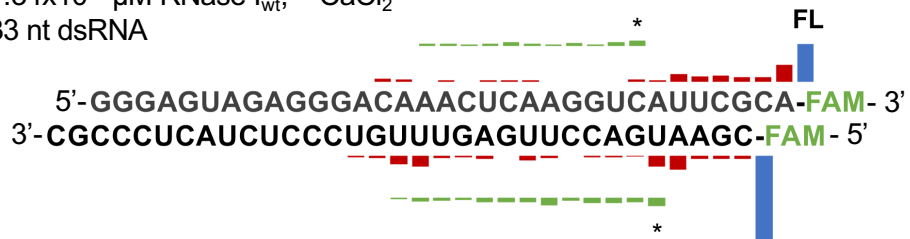

**B**  $1.34 \times 10^{-3} \mu\text{M}$  RNase I<sub>wt</sub>, + CaCl<sub>2</sub>  
33 nt dsRNA

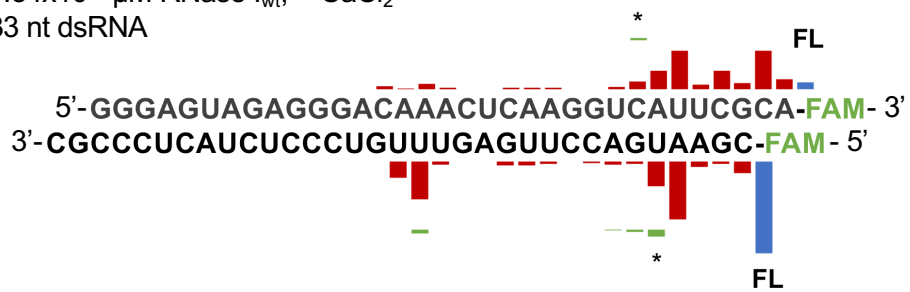

**C**  
5'-GGGAGUAGAGGGACAAACUCAAGGUCAUUCGCA-FAM-3'  
3'-CGCCUCAUCUCCCUGUUUGAGUUCCAGUAAGC-FAM-5'

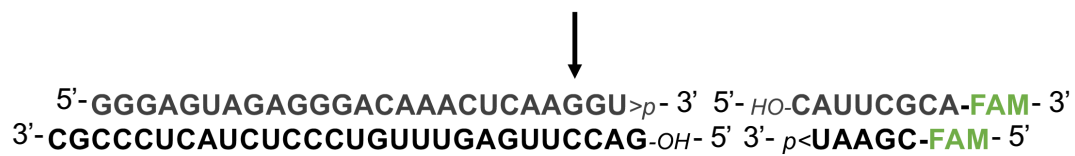

# Figure S4

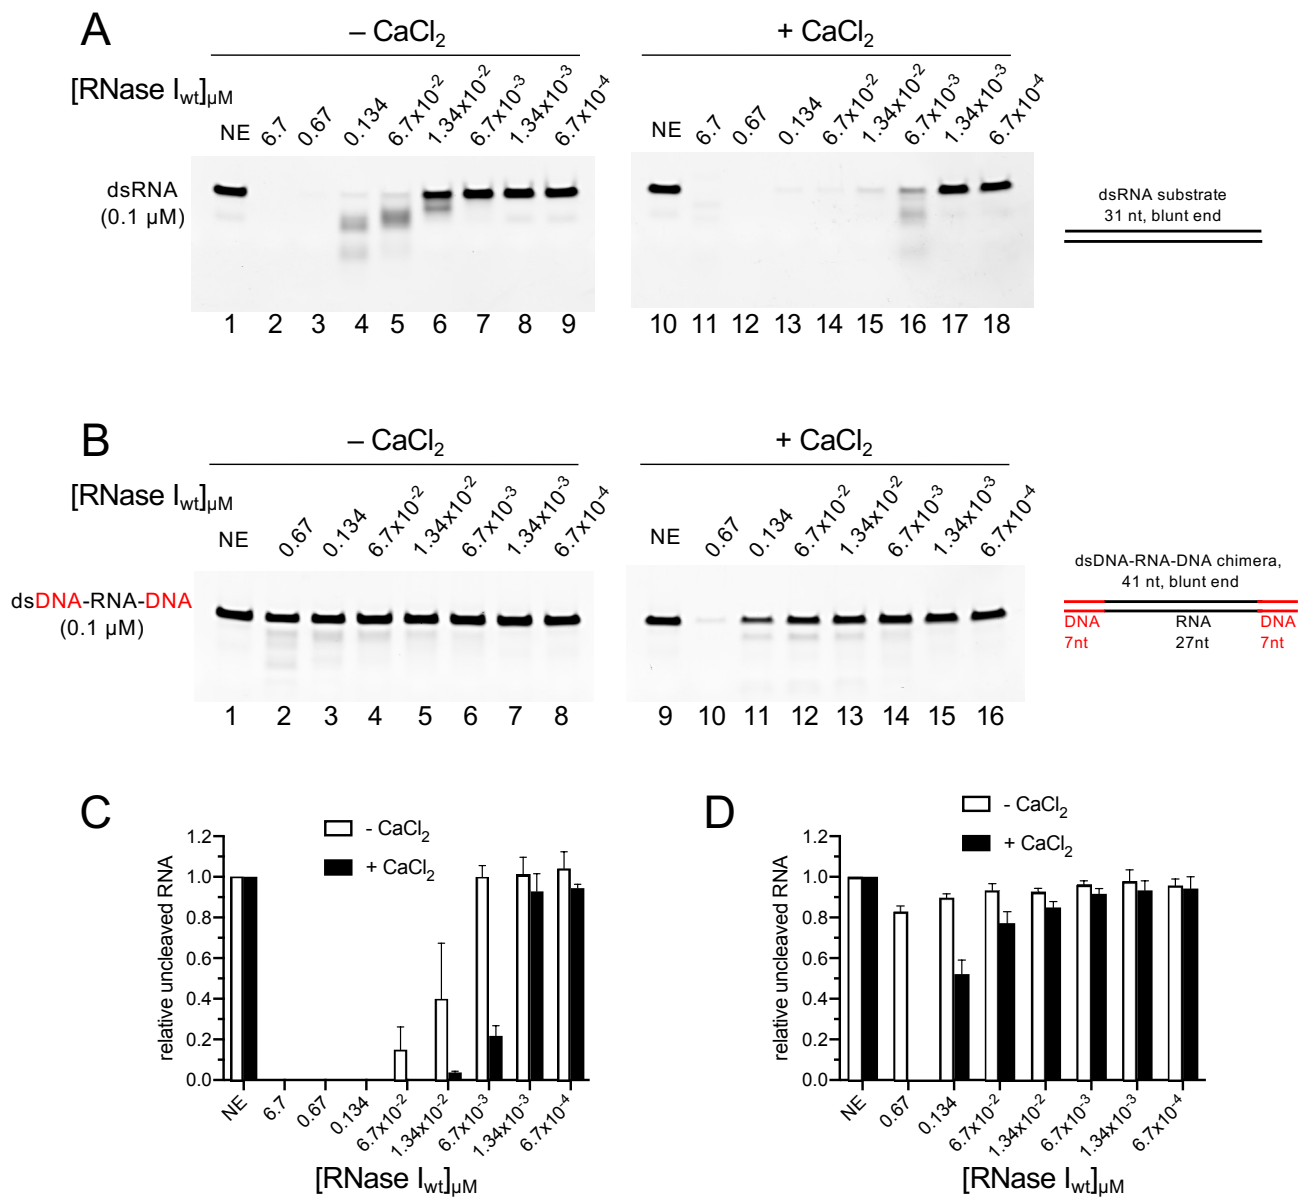

**Figure S5**

**A**

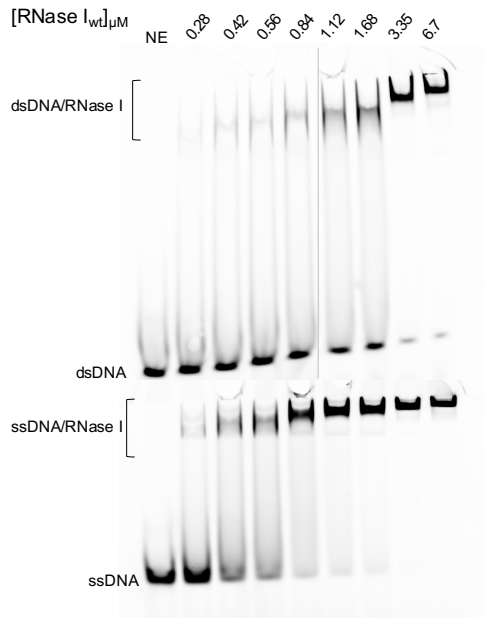

**B**

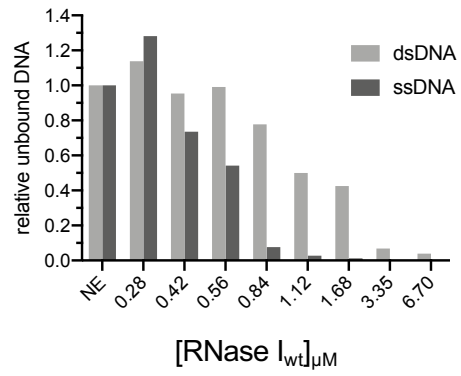

**C**

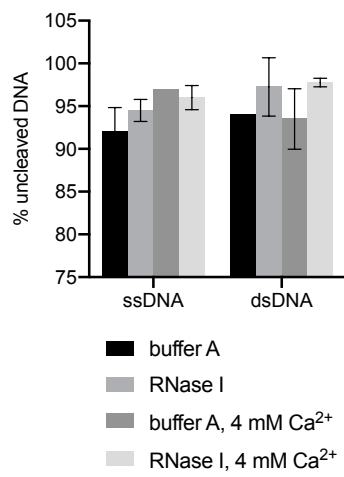

# Figure S6

A

0.67  $\mu\text{M}$  RNase I<sub>wt</sub>, - CaCl<sub>2</sub>  
26 nt dsRNA

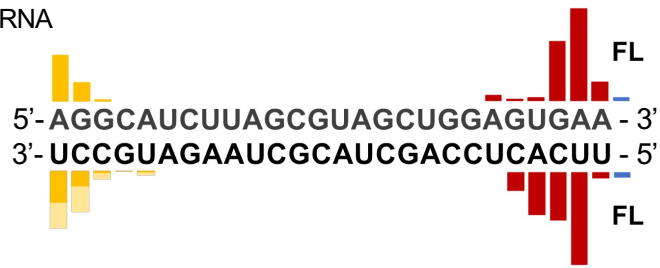

6.7x10<sup>-2</sup>  $\mu\text{M}$  RNase I<sub>wt</sub>, + CaCl<sub>2</sub>  
26 nt dsRNA

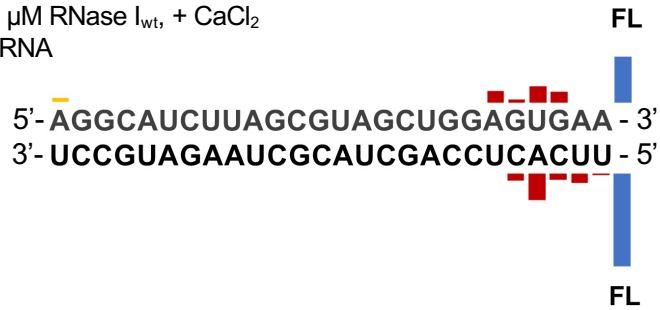

B

0.134  $\mu\text{M}$  RNase I<sub>wt</sub>, - CaCl<sub>2</sub>  
41 nt dsRNA

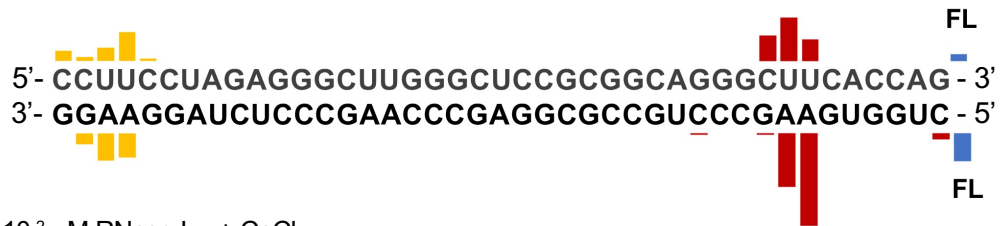

1.34x10<sup>-2</sup>  $\mu\text{M}$  RNase I<sub>wt</sub>, + CaCl<sub>2</sub>  
41 nt dsRNA

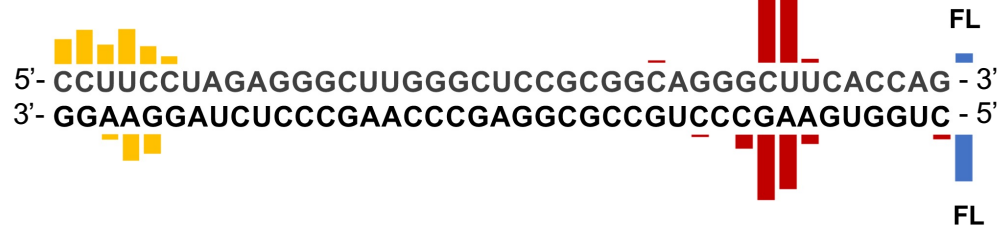

**Figure S7**

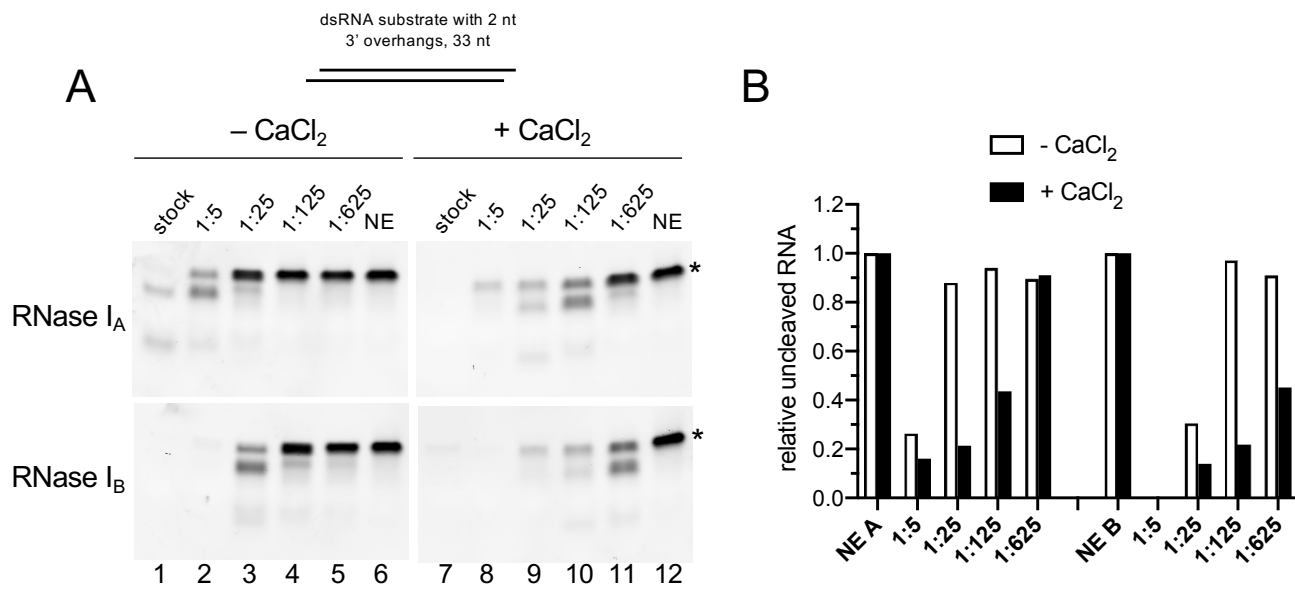

# Figure S8

## A

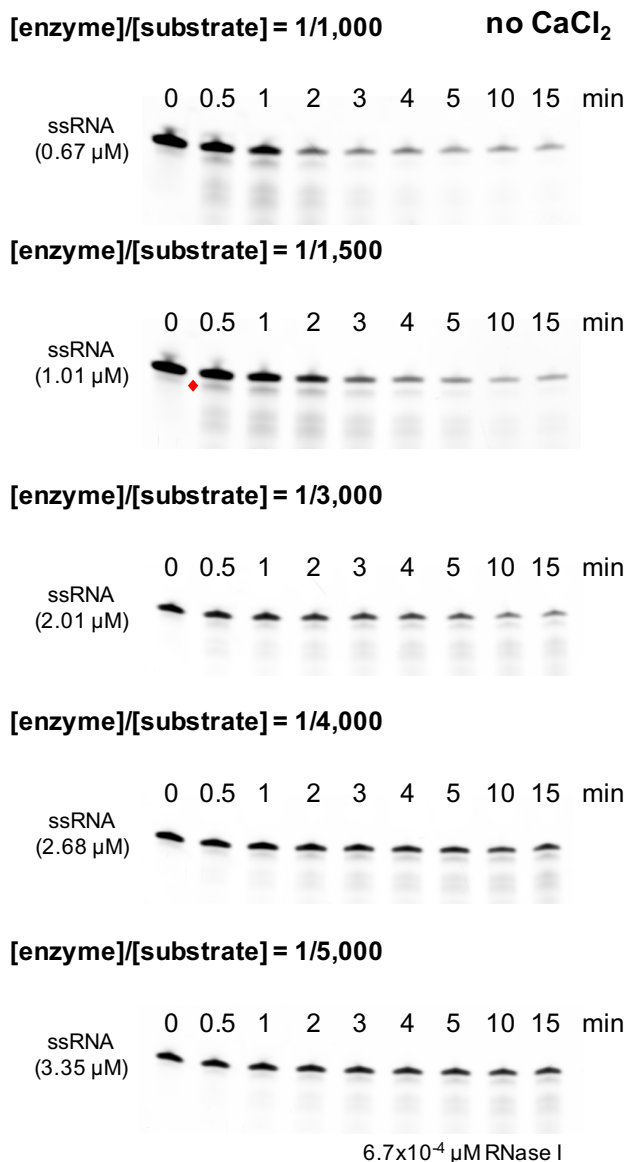

## B

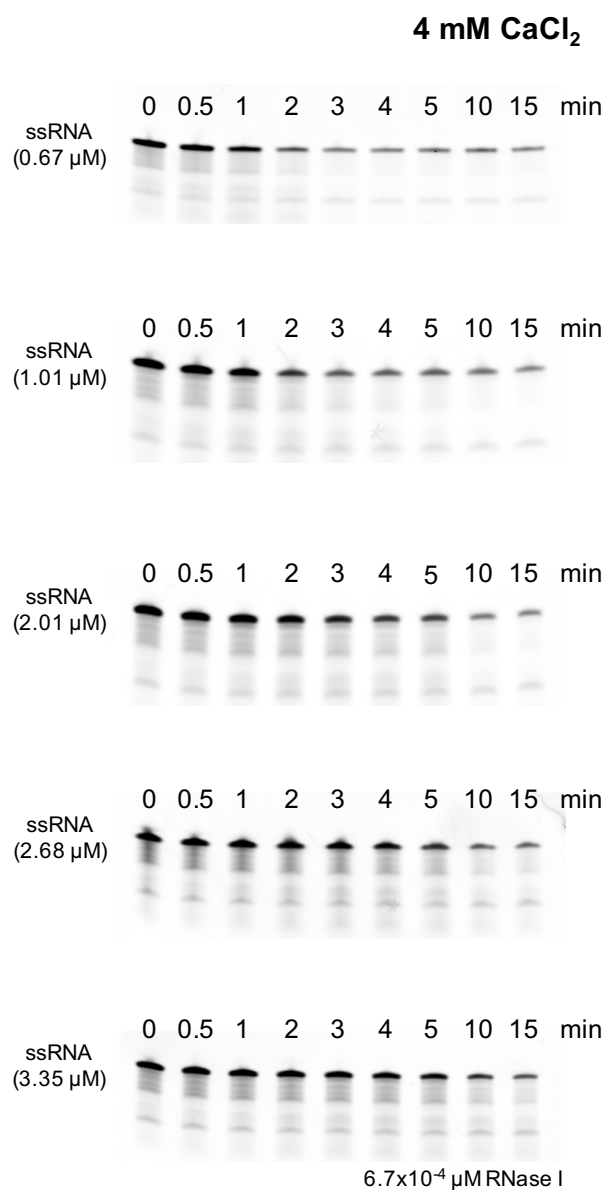

## C

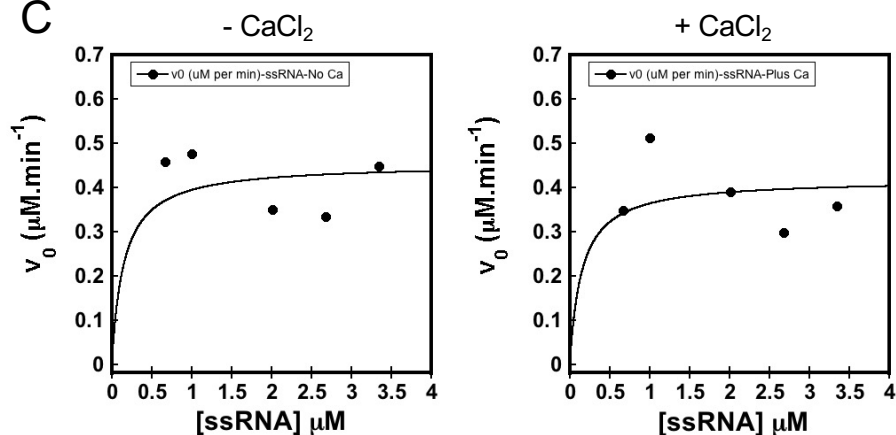

# Figure S9

A

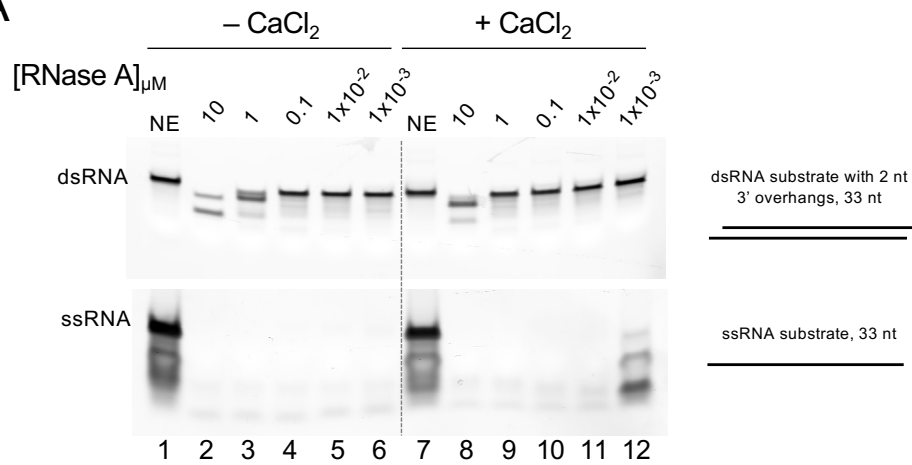

B

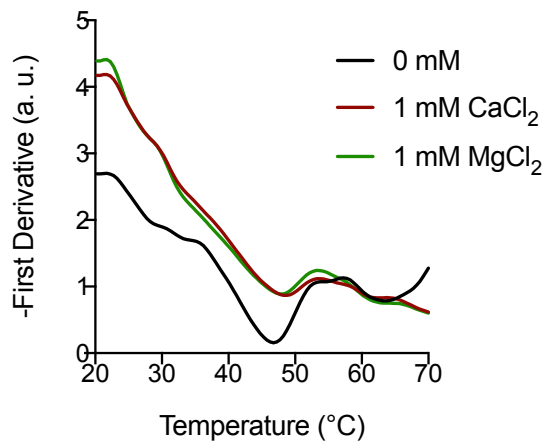

| Cation                 | T <sub>m</sub> (°C) |
|------------------------|---------------------|
| 0 mM                   | 55.4 ± 2.2          |
| 1 mM CaCl <sub>2</sub> | 53.8 ± 0.4          |
| 1 mM MgCl <sub>2</sub> | 53.4 ± 0.9          |

**Figure S10**

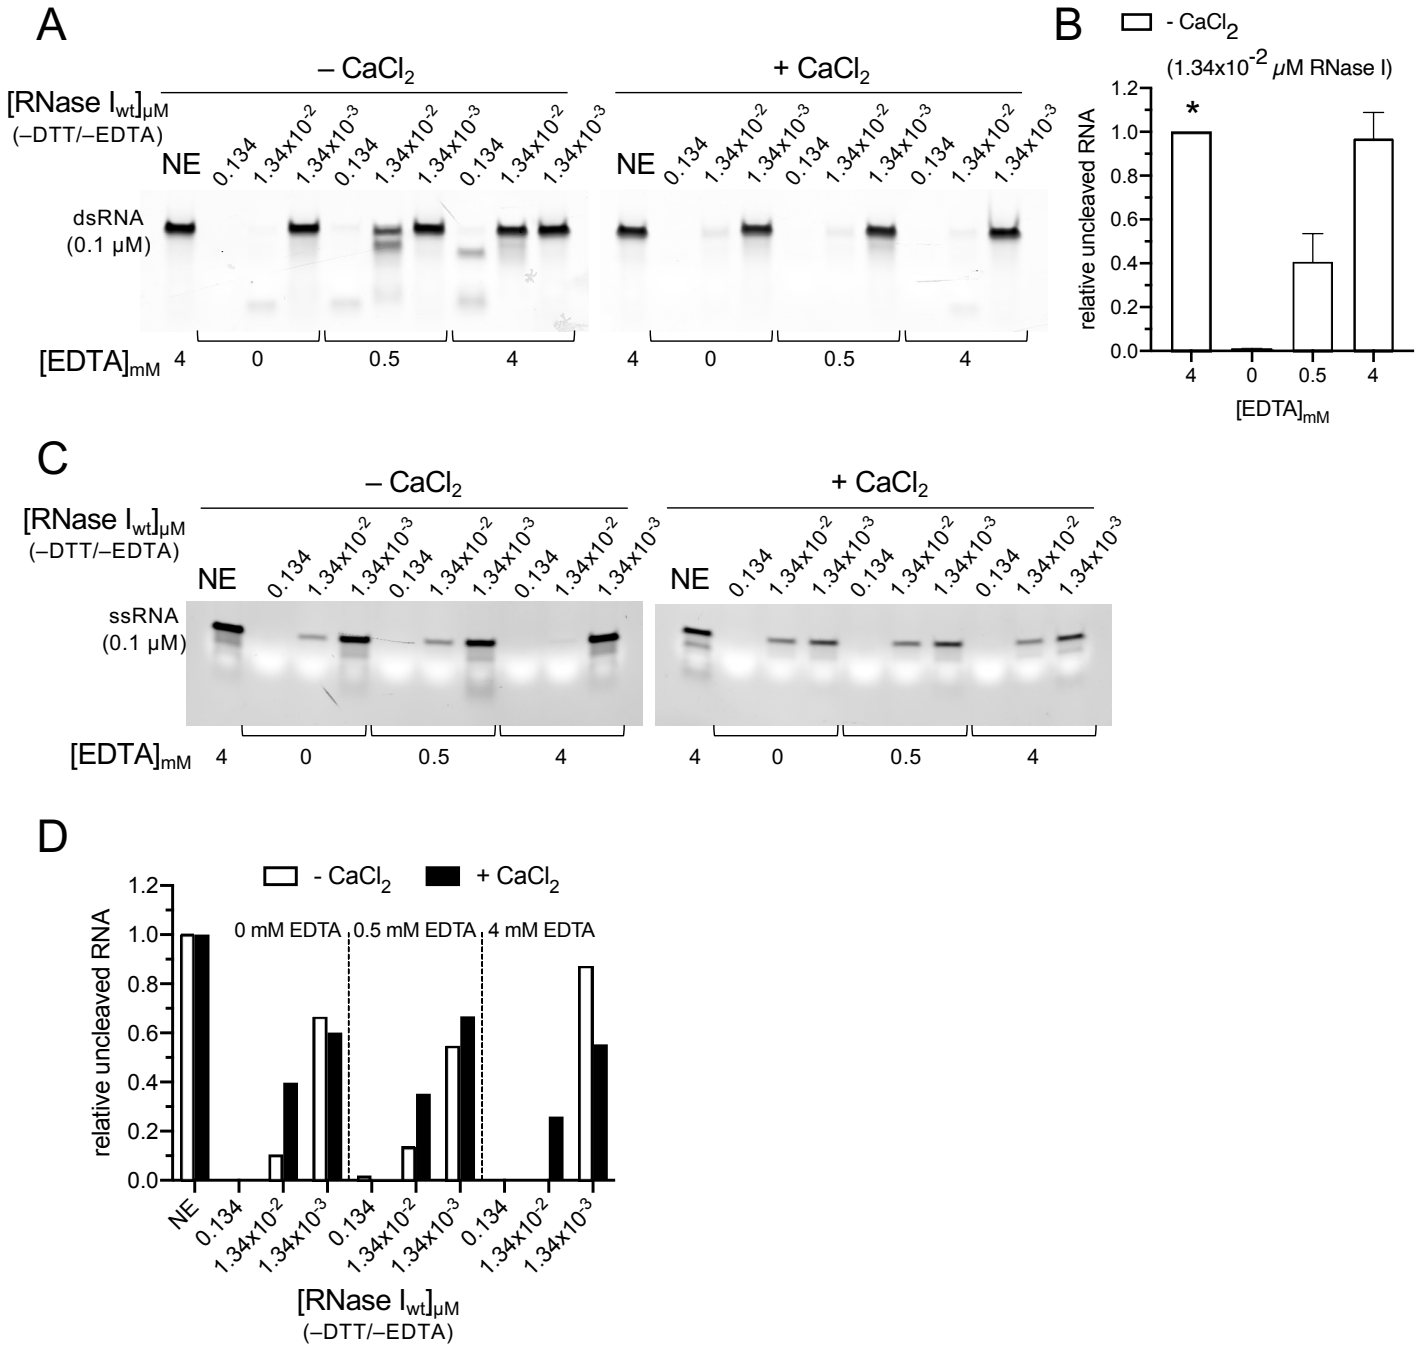



**Figure S11**

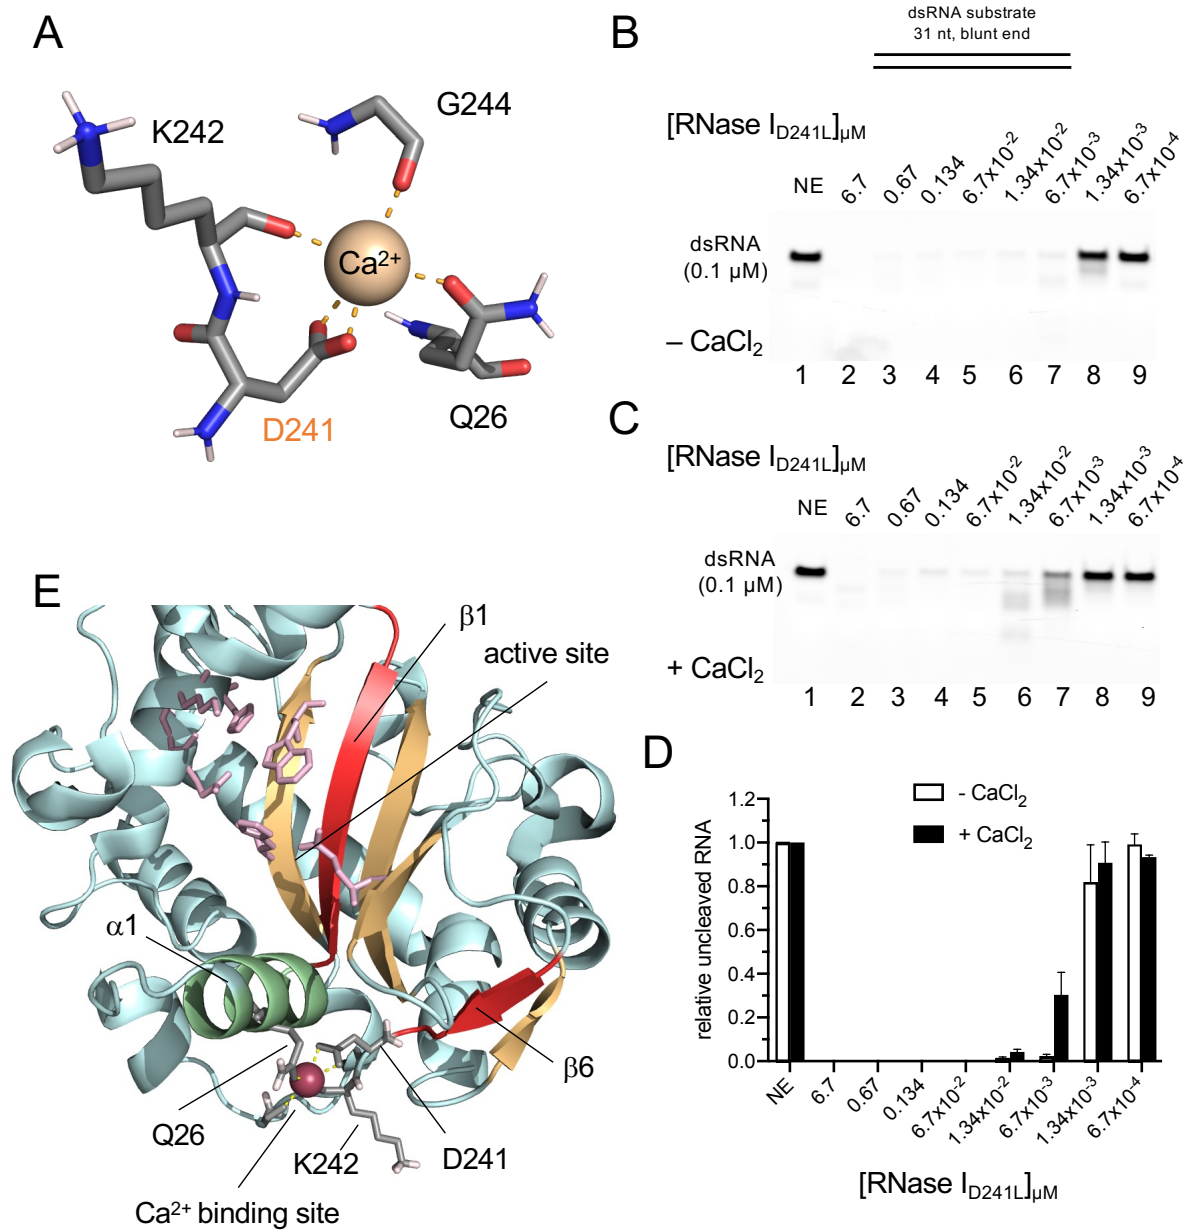

**Figure S12**

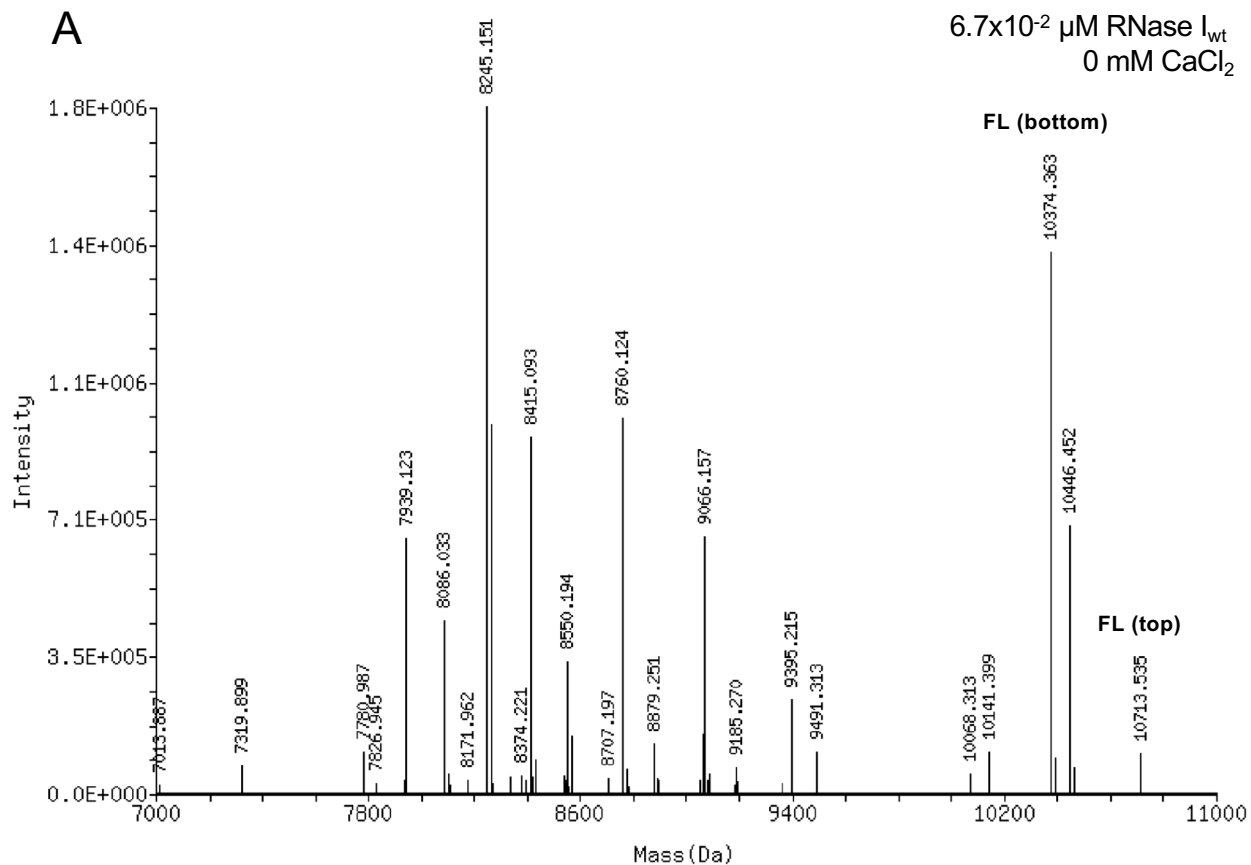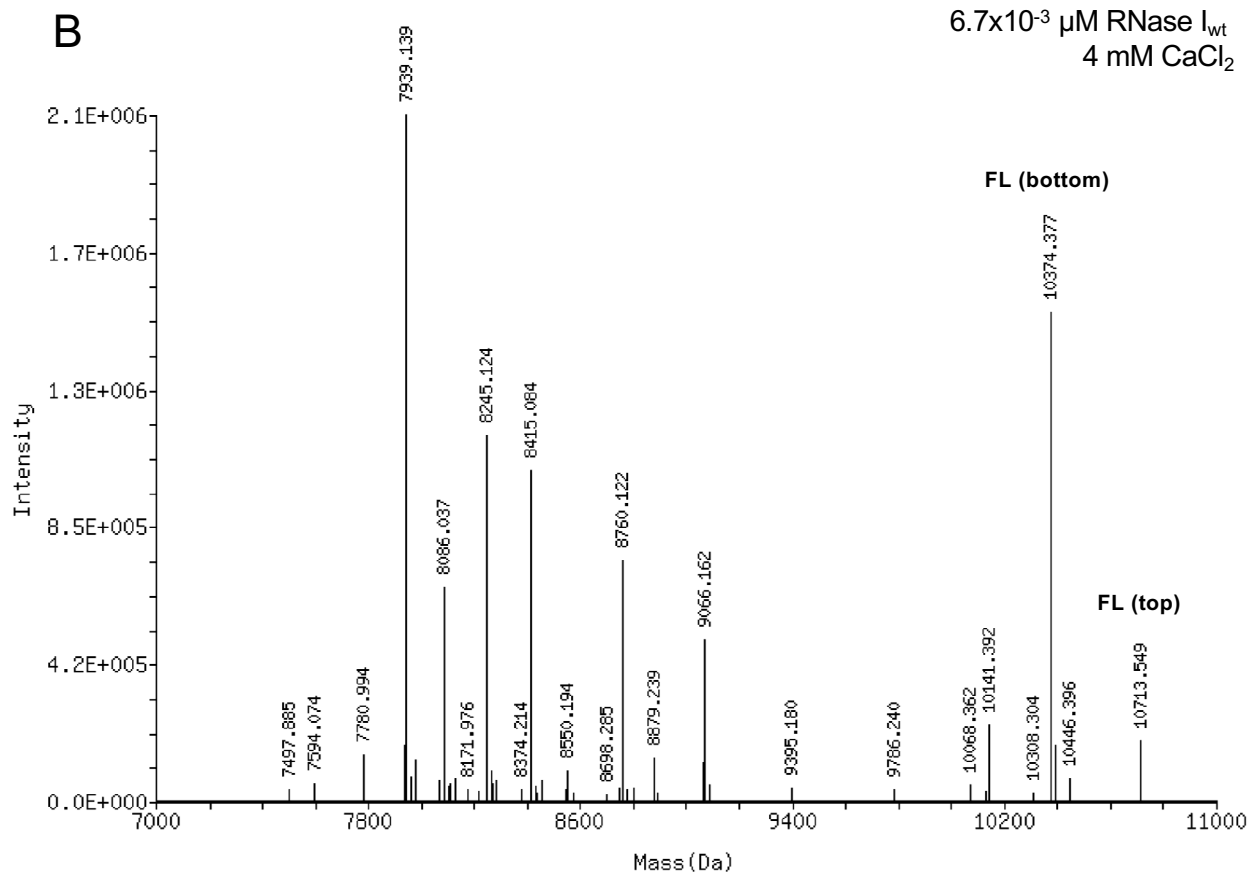

**Figure S13**

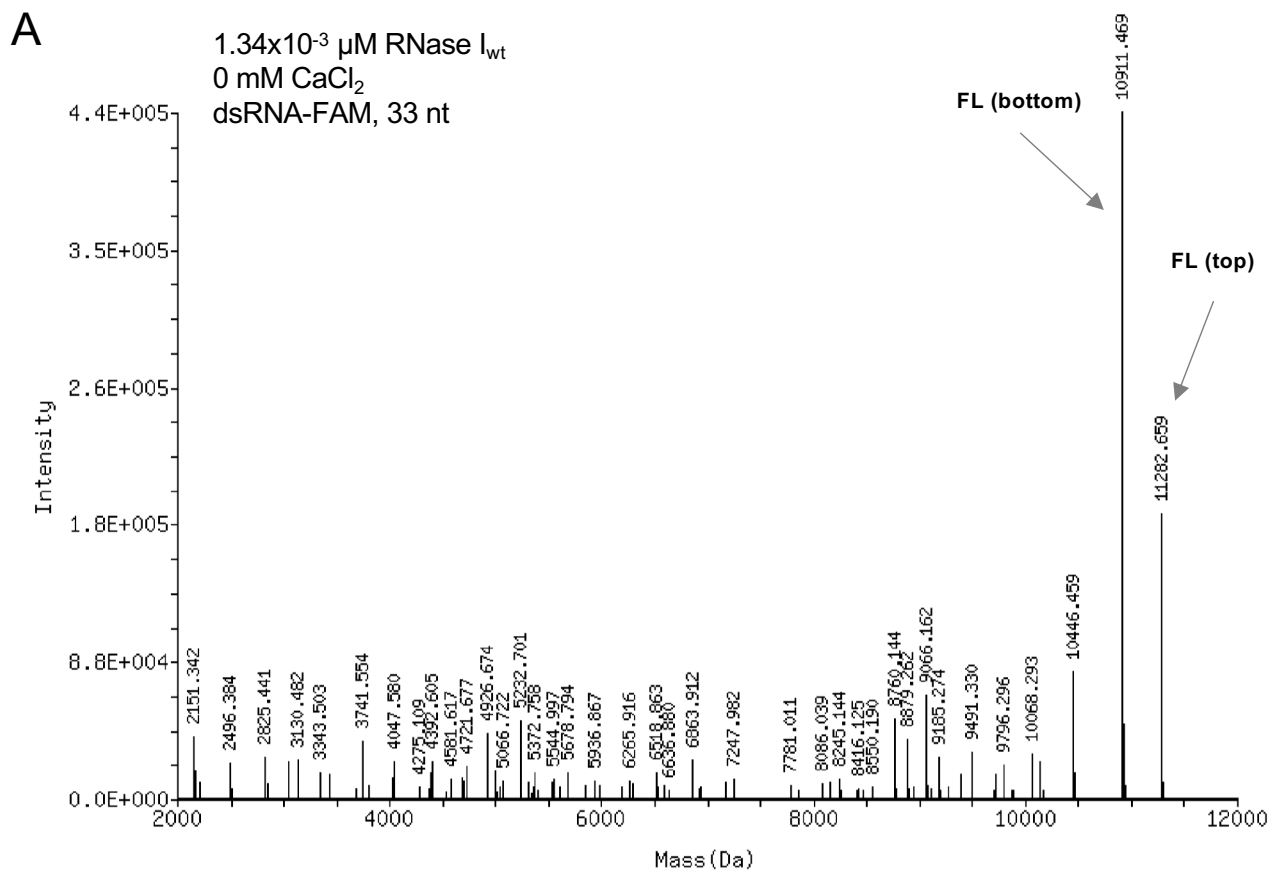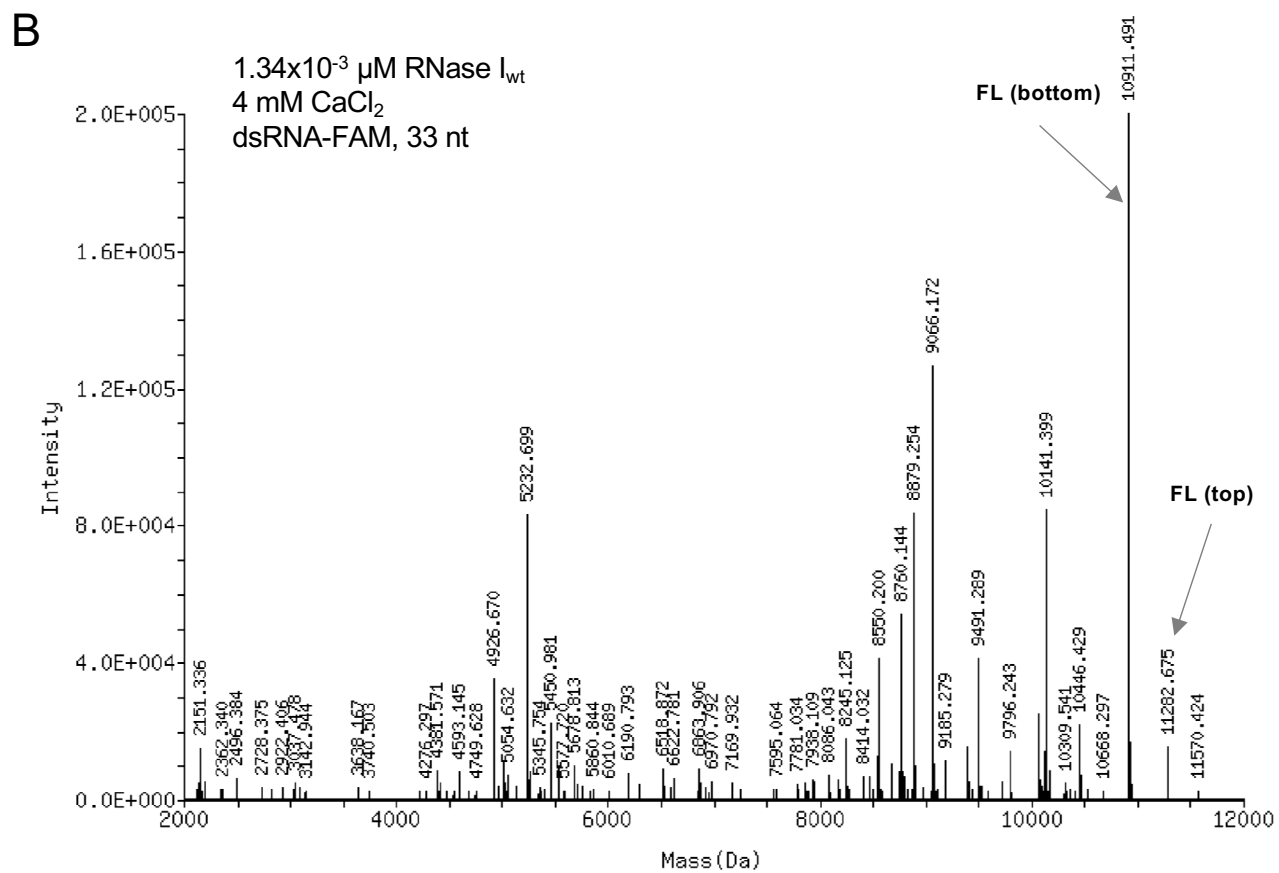

# Figure S14

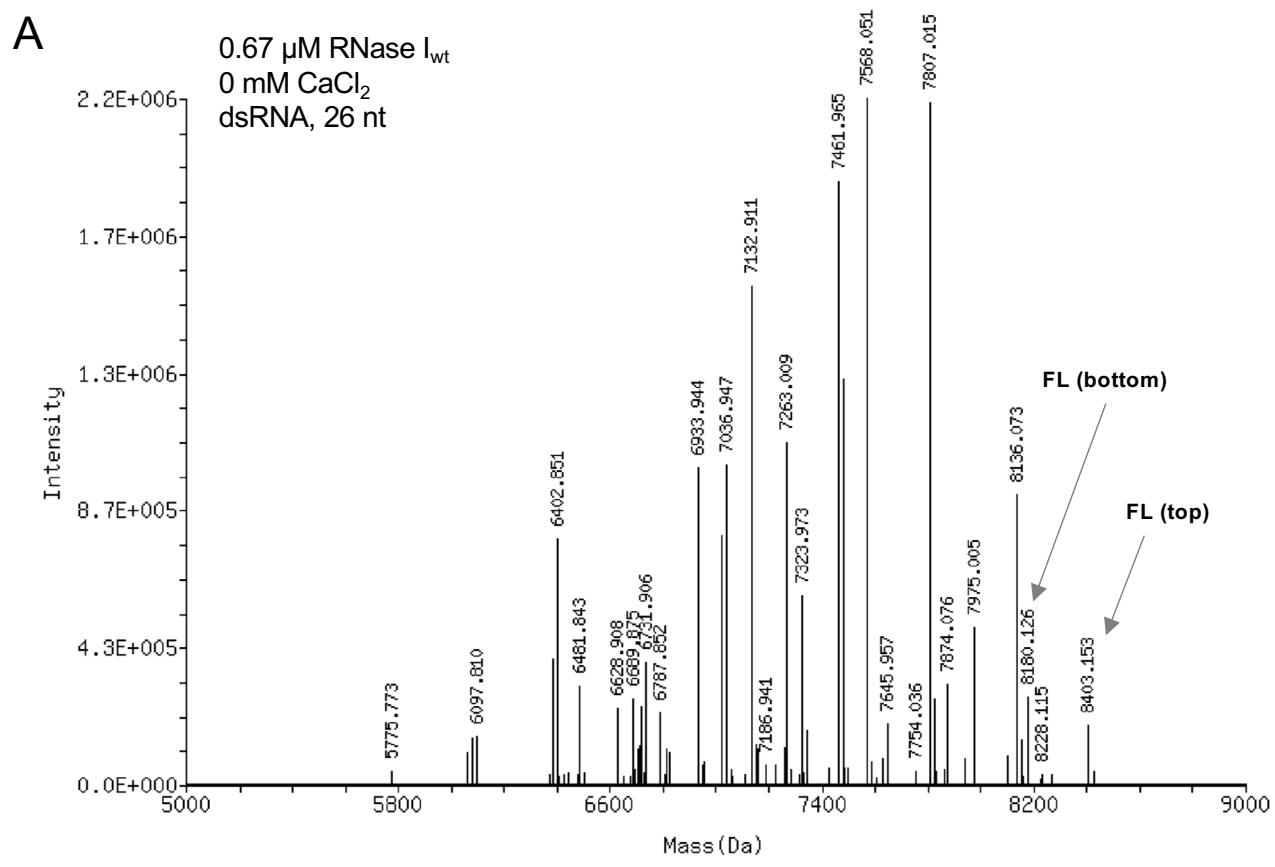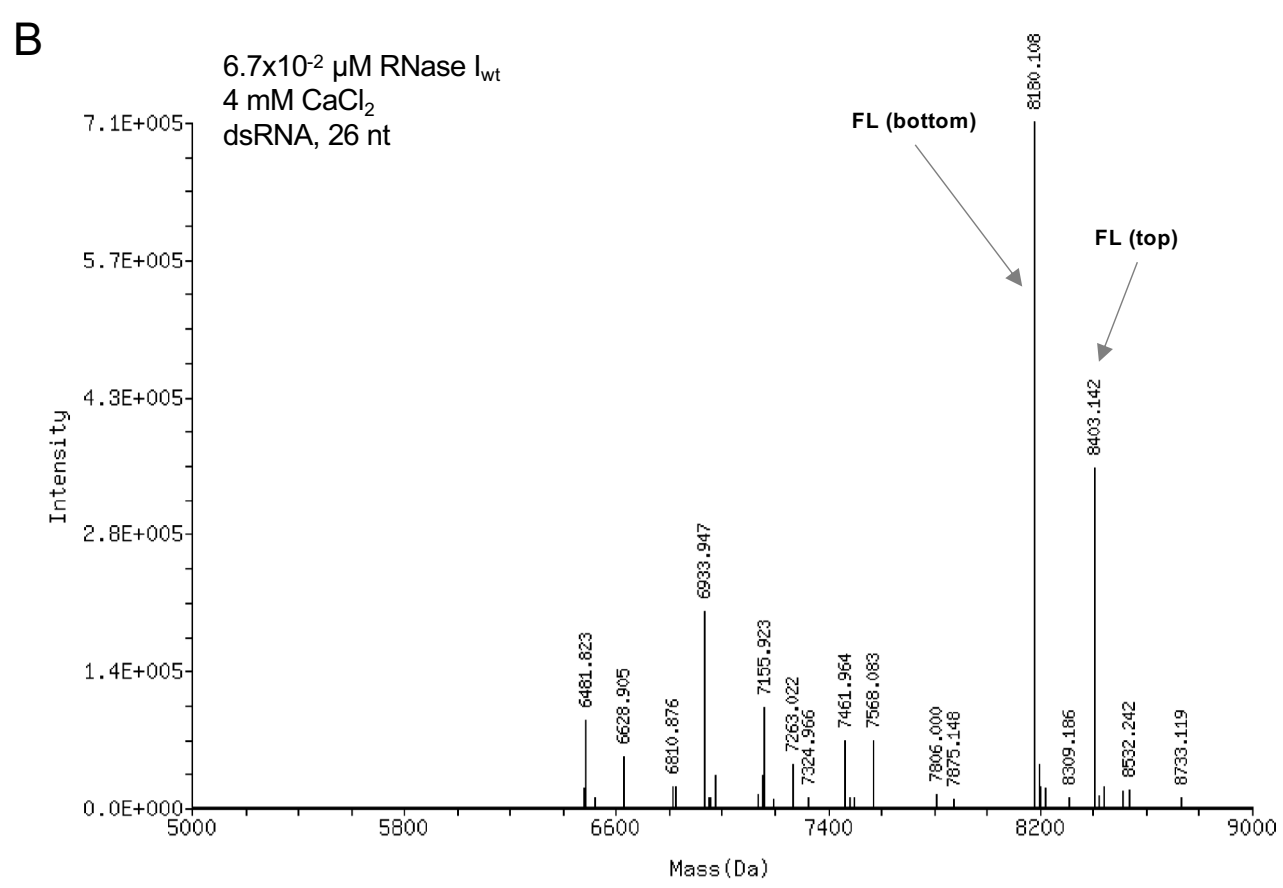

**Figure S15**

**A**

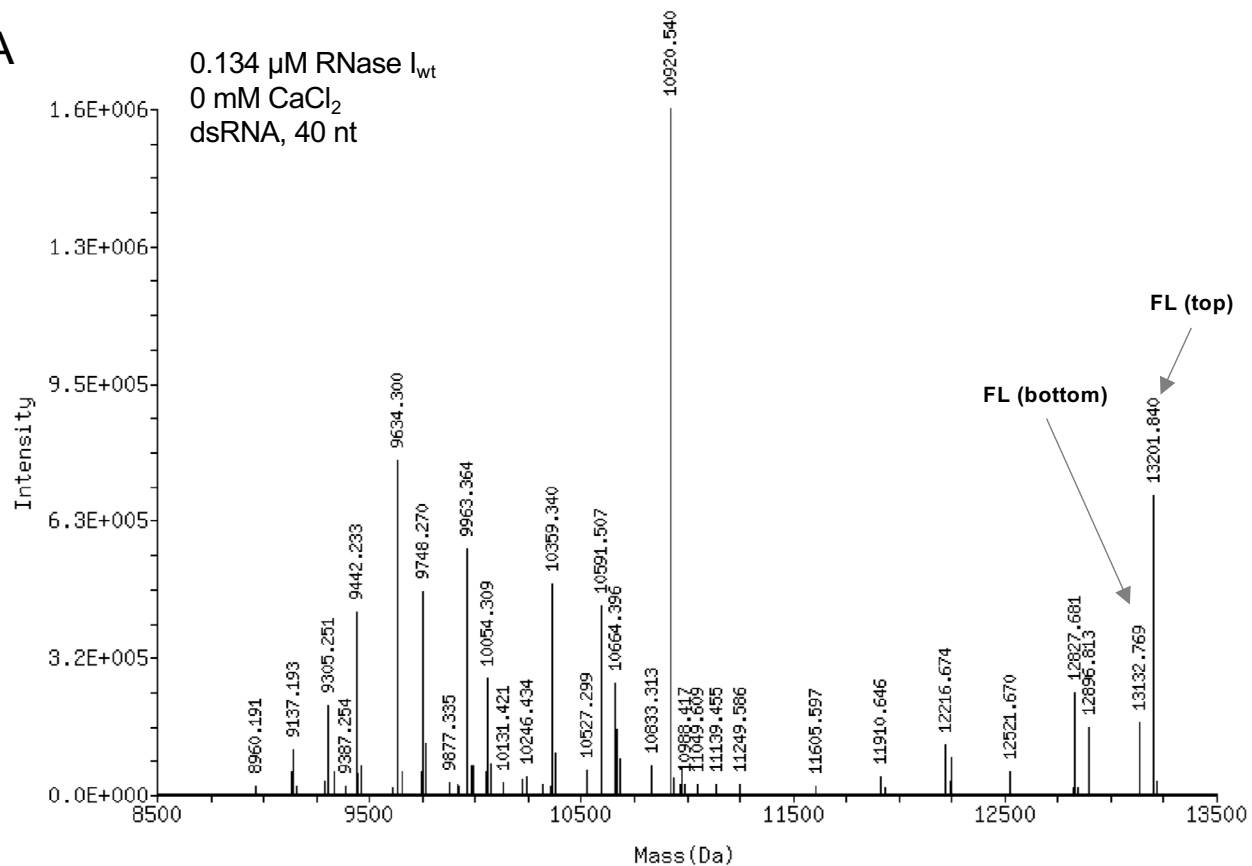

**B**

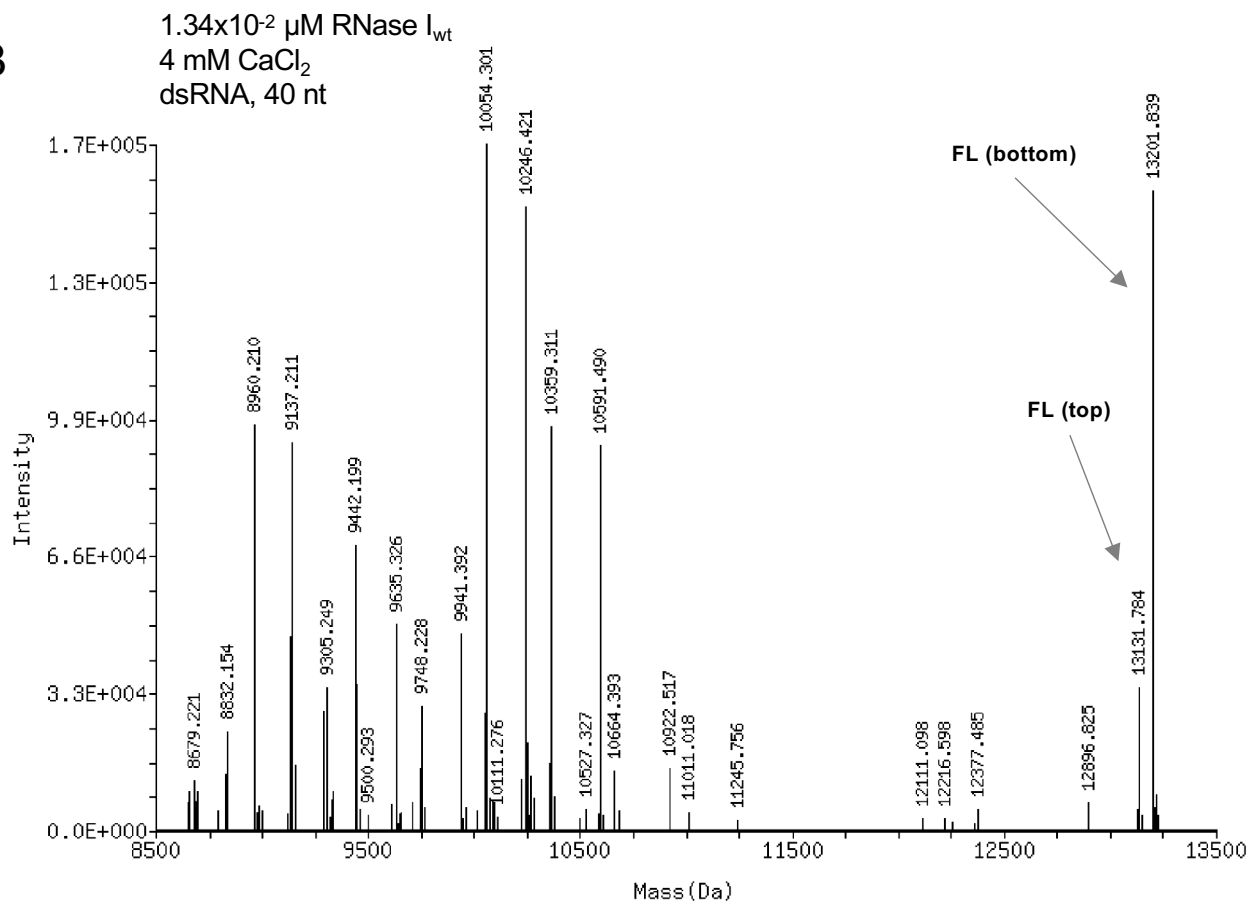

# Figure S16

**A**  $6.7 \times 10^{-3}$   $\mu\text{M}$  RNase I<sub>wt</sub> (-DTT/-EDTA)  
0 mM CaCl<sub>2</sub>  
dsRNA, 33 nt

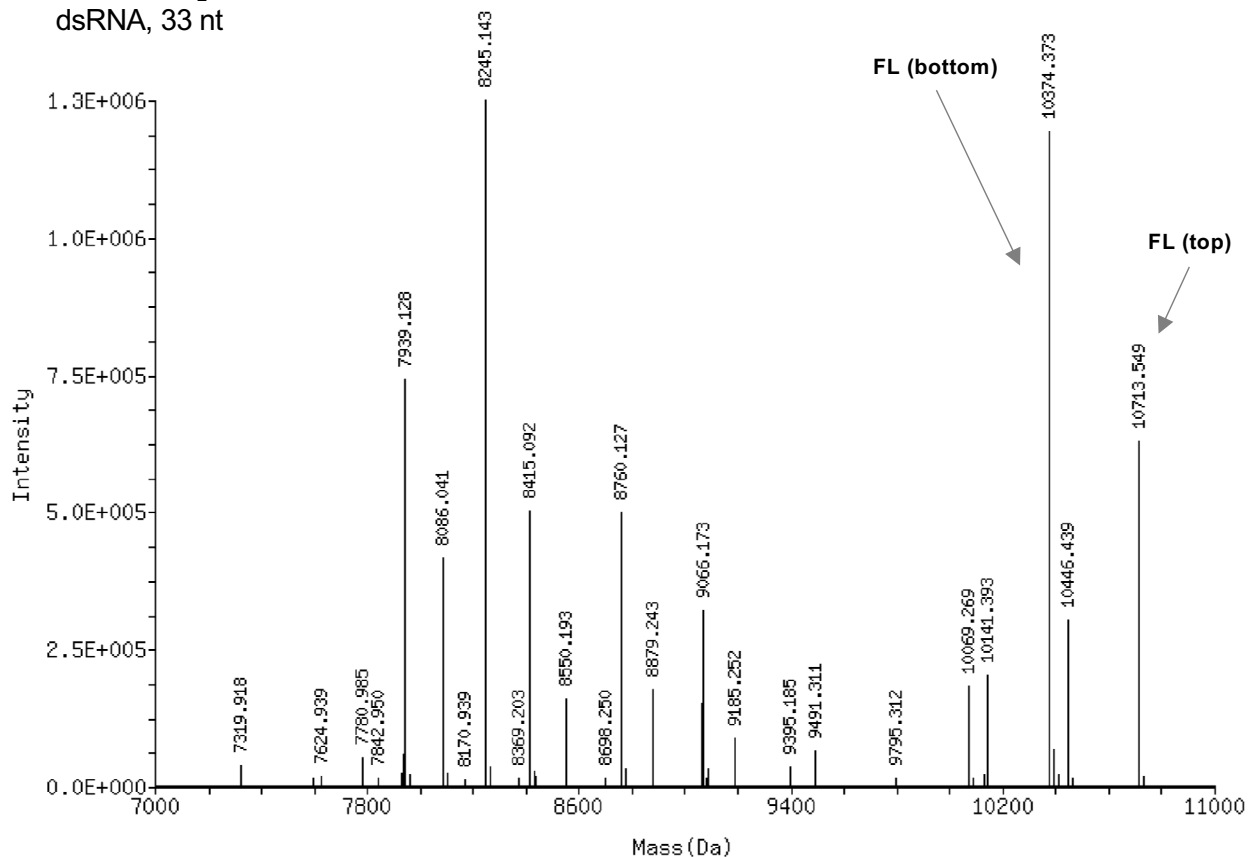

**B**  $6.7 \times 10^{-3}$   $\mu\text{M}$  RNase I<sub>wt</sub> (-DTT/-EDTA)  
4 mM CaCl<sub>2</sub>  
dsRNA, 33 nt

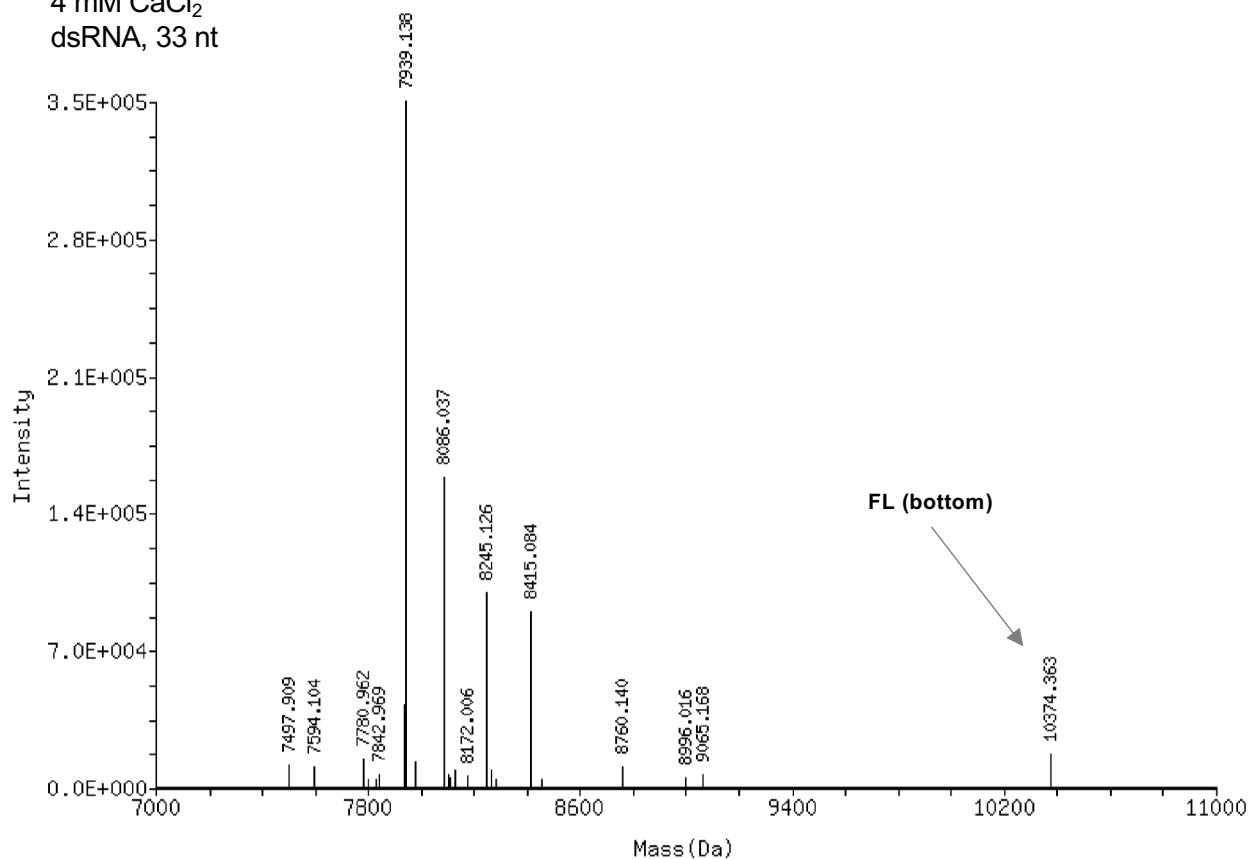

# Table S1

| RNA/DNA substrates | Oligo Sequence                                            | Size (nt) | Type               | 5' end     | 3' end     |
|--------------------|-----------------------------------------------------------|-----------|--------------------|------------|------------|
| R270(33t)          | GGGAGUAGAGGGACAAACUCAAGGUCAUUCGCA                         | 33        | RNA                | hydroxyl   | hydroxyl   |
| R271(33b)          | CGAAUGACCUUGAGUUUGUCCCUACUCCCGC                           | 33        | RNA                | hydroxyl   | hydroxyl   |
| R272(31t)          | AGUGGGAGAGGGACAAACUCAAGGUCAUUCG                           | 31        | RNA                | hydroxyl   | hydroxyl   |
| R273(31b)          | CGAAUGACCUUGAGUUUGUCCCUACUCCCGC                           | 31        | RNA                | hydroxyl   | hydroxyl   |
| R274(26t)          | AGGCAUCUUAGCGUAGCUGGAGUGAA                                | 26        | RNA                | hydroxyl   | hydroxyl   |
| R275(26b)          | UUCACUCCAGCUACGCUAAGAUGCCU                                | 26        | RNA                | hydroxyl   | hydroxyl   |
| R276(41t)          | CCUCCUAGAGGGCUUGGGCUCCGCGGCAGGGCUUACCAG                   | 41        | RNA                | hydroxyl   | hydroxyl   |
| R277(41b)          | CUGGUGAAGCCCGCCGCGGAGCCCAAGCCUCUAGGAAGG                   | 41        | RNA                | hydroxyl   | hydroxyl   |
| R279(41t)          | <b>CCTTCCT</b> AGAGGGCUUGGGCUCCGCGGCAGGGCU <b>TCACCAG</b> | 41        | <b>DNA-RNA-DNA</b> | hydroxyl   | hydroxyl   |
| R280(41b)          | <b>CTGGTGA</b> AGCCCGCCGCGGAGCCCAAGCCUCU <b>AGGAAGG</b>   | 41        | <b>DNA-RNA-DNA</b> | hydroxyl   | hydroxyl   |
| R337(33t)          | GGGAGUAGAGGGACAAACUCAAGGUCAUUCGCA- <b>FAM</b>             | 33        | RNA                | hydroxyl   | <b>FAM</b> |
| R338(33b)          | <b>FAM</b> -CGAAUGACCUUGAGUUUGUCCCUACUCCCGC               | 33        | RNA                | <b>FAM</b> | hydroxyl   |
| D434               | <b>AGTGGGAGAGGGACAACTCAAGGTCATTCC</b>                     | 31        | <b>DNA</b>         | hydroxyl   | hydroxyl   |

R270/271: 33 nt dsRNA with 2 nt 3' overhangs

R274/275: 26 nt dsRNA with blunt ends (for MS)

R276/277: 41 nt dsRNA with blunt ends (for MS)

R272/273: 31 nt dsRNA with blunt ends

D434/R273: 31 nt double stranded DNA/RNA hybrid with blunt ends

R279/280: 41 nt double stranded DNA-RNA-DNA chimera with blunt ends

R337/338: 33 nt dsRNA with 2 nt 3' overhangs and FAM labeled 3' (top) and 5' (bottom) ends (for MS)

t: top strand

b: bottom strand

# Table S2

**A**

| 6.7x10 <sup>-2</sup> μM RNase I <sub>wt</sub> , - CaCl <sub>2</sub> |                                          | Calc.     | Found     | Error/ppm | % Rel. |
|---------------------------------------------------------------------|------------------------------------------|-----------|-----------|-----------|--------|
| <b>RNA top strand</b>                                               | 5'-GGGAGUAGAGGGGACAAACUCAAGGUCAUUCGCA-3' | 10713.518 | 10713.535 | -1.59     | 4.4    |
| Top 5'>p frags                                                      | GGGAGUAGAGGGGACAAACUCAAGGUCAUUCGC>p      | 10446.421 | 10446.455 | -3.24     | 31.1   |
|                                                                     | GGGAGUAGAGGGGACAAACUCAAGGUCAUUCG>p       | 10141.380 | 10141.399 | -1.88     | 5.4    |
|                                                                     | GGGAGUAGAGGGGACAAACUCAAGGUCAUUC>p        | 9796.333  | n.f.      | n.f.      | n.f.   |
|                                                                     | GGGAGUAGAGGGGACAAACUCAAGGUCAU>p          | 9491.291  | 9491.311  | -2.09     | 5.6    |
|                                                                     | GGGAGUAGAGGGGACAAACUCAAGGUCAU>p          | 9185.266  | 9185.238  | 3.04      | 3.9    |
|                                                                     | GGGAGUAGAGGGGACAAACUCAAGGUCA>p           | 8879.241  | 8879.253  | -1.40     | 7.2    |
|                                                                     | GGGAGUAGAGGGGACAAACUCAAGGUC>p            | 8550.188  | 8550.194  | -0.69     | 19.3   |
|                                                                     | GGGAGUAGAGGGGACAAACUCAAGGU>p             | 8245.147  | 8245.153  | -0.75     | 100    |
|                                                                     | GGGAGUAGAGGGGACAAACUCAAGG>p              | 7939.122  | 7939.124  | -0.31     | 36.4   |
| <b>RNA bottom strand</b>                                            | 3'-CGCCCUCAUCUCCCGUUUGAGUUCAGUAAGC-5'    | 10374.340 | 10374.362 | -2.12     | 77.4   |
| Bottom 3' frags                                                     | CGCCCUCAUCUCCCGUUUGAGUUCAGUAAG           | 10069.299 | 10069.319 | -2.02     | 2.0    |
|                                                                     | CGCCCUCAUCUCCCGUUUGAGUUCAGUAA            | 9724.251  | n.f.      | n.f.      | n.f.   |
|                                                                     | CGCCCUCAUCUCCCGUUUGAGUUCAGUA             | 9395.199  | 9395.209  | -1.09     | 13.2   |
|                                                                     | CGCCCUCAUCUCCCGUUUGAGUUCAGU              | 9066.146  | 9066.155  | -0.96     | 36.5   |
|                                                                     | CGCCCUCAUCUCCCGUUUGAGUUCAG               | 8760.121  | 8760.124  | -0.34     | 54.9   |
|                                                                     | CGCCCUCAUCUCCCGUUUGAGUUCCA               | 8415.074  | 8415.092  | -2.19     | 51.5   |
|                                                                     | CGCCCUCAUCUCCCGUUUGAGUUC                 | 8086.021  | 8086.034  | -1.60     | 25.1   |

**B**

| 6.7x10 <sup>-3</sup> μM RNase I <sub>wt</sub> , + CaCl <sub>2</sub> |                                          | Calc.     | Found     | Error/ppm | % Rel. |
|---------------------------------------------------------------------|------------------------------------------|-----------|-----------|-----------|--------|
| <b>RNA top strand</b>                                               | 5'-GGGAGUAGAGGGGACAAACUCAAGGUCAUUCGCA-3' | 10713.518 | 10713.549 | -2.89     | 8.8    |
| Top 5'>p frags                                                      | GGGAGUAGAGGGGACAAACUCAAGGUCAUUCGC>p      | 10446.421 | 10446.396 | 2.41      | 3.2    |
|                                                                     | GGGAGUAGAGGGGACAAACUCAAGGUCAUUCG>p       | 10141.380 | 10141.392 | -1.19     | 11.1   |
|                                                                     | GGGAGUAGAGGGGACAAACUCAAGGUCAUUC>p        | 9796.333  | n.f.      | n.f.      | n.f.   |
|                                                                     | GGGAGUAGAGGGGACAAACUCAAGGUCAU>p          | 9491.291  | n.f.      | n.f.      | n.f.   |
|                                                                     | GGGAGUAGAGGGGACAAACUCAAGGUCAU>p          | 9185.266  | n.f.      | n.f.      | n.f.   |
|                                                                     | GGGAGUAGAGGGGACAAACUCAAGGUCA>p           | 8879.241  | 8879.239  | 0.18      | 6.2    |
|                                                                     | GGGAGUAGAGGGGACAAACUCAAGGUC>p            | 8550.188  | 8550.194  | -0.69     | 4.4    |
|                                                                     | GGGAGUAGAGGGGACAAACUCAAGGU>p             | 8245.147  | 8245.124  | 2.77      | 53.3   |
|                                                                     | GGGAGUAGAGGGGACAAACUCAAGG>p              | 7939.122  | 7939.139  | -2.20     | 100    |
| <b>RNA bottom strand</b>                                            | 3'-CGCCCUCAUCUCCCGUUUGAGUUCAGUAAGC-5'    | 10374.340 | 10374.377 | -3.57     | 71.3   |
| Bottom 3' frags                                                     | CGCCCUCAUCUCCCGUUUGAGUUCAGUAAG           | 10069.299 | n.f.      | n.f.      | n.f.   |
|                                                                     | CGCCCUCAUCUCCCGUUUGAGUUCAGUAA            | 9724.251  | n.f.      | n.f.      | n.f.   |
|                                                                     | CGCCCUCAUCUCCCGUUUGAGUUCAGUA             | 9395.199  | 9395.180  | 2.00      | 1.8    |
|                                                                     | CGCCCUCAUCUCCCGUUUGAGUUCAGU              | 9066.146  | 9066.162  | -1.73     | 23.5   |
|                                                                     | CGCCCUCAUCUCCCGUUUGAGUUCAG               | 8760.121  | 8760.122  | -0.11     | 35.0   |
|                                                                     | CGCCCUCAUCUCCCGUUUGAGUUCCA               | 8415.074  | 8415.084  | -1.24     | 48.2   |
|                                                                     | CGCCCUCAUCUCCCGUUUGAGUUC                 | 8086.021  | 8086.037  | -1.97     | 31.1   |
|                                                                     | CGCCCUCAUCUCCCGUUUGAGUUC                 | 7780.980  | 7780.994  | -1.82     | 6.8    |



# Table S3

**A**

| 6.7x10 <sup>-3</sup> μM RNase I <sub>(-DTT-EDTA)</sub> , -CaCl <sub>2</sub> |                                         | Calc.                                 | Found     | Error/ppm | % Rel. |
|-----------------------------------------------------------------------------|-----------------------------------------|---------------------------------------|-----------|-----------|--------|
| <b>RNA top strand</b>                                                       | 5'-GGGAGUAGAGGGACAAACUCAAGGUCAUUCGCA-3' | 10713.518                             | 10713.549 | -2.89     | 50.2   |
| Top 5'>p frags                                                              | GGGAGUAGAGGGACAAACUCAAGGUCAUUCGC>p      | 10446.421                             | 10446.439 | -1.70     | 24.2   |
|                                                                             | GGGAGUAGAGGGACAAACUCAAGGUCAUUCG>p       | 10141.380                             | 10141.393 | -1.29     | 16.1   |
|                                                                             | GGGAGUAGAGGGACAAACUCAAGGUCAUUC>p        | 9796.333                              | n.f.      | n.f.      | n.f.   |
|                                                                             | GGGAGUAGAGGGACAAACUCAAGGUCAUU>p         | 9491.291                              | 9491.311  | -2.09     | 5.0    |
|                                                                             | GGGAGUAGAGGGACAAACUCAAGGUCAU>p          | 9185.266                              | 9185.252  | 1.51      | 7.0    |
|                                                                             | GGGAGUAGAGGGACAAACUCAAGGUCA>p           | 8879.241                              | 8879.243  | -0.27     | 14.1   |
|                                                                             | GGGAGUAGAGGGACAAACUCAAGGUC>p            | 8550.188                              | 8550.193  | -0.57     | 12.6   |
|                                                                             | GGGAGUAGAGGGACAAACUCAAGGU>p             | 8245.147                              | 8245.143  | 0.46      | 100    |
|                                                                             | GGGAGUAGAGGGACAAACUCAAGG>p              | 7939.122                              | 7939.128  | -0.82     | 59.3   |
|                                                                             | <b>RNA bottom strand</b>                | 3'-CGCCCUCAUCUCCUGUUUGAGUUCAGUAAGC-5' | 10374.340 | 10374.373 | -3.18  |
| Bottom 3' frags                                                             | CGCCCUCAUCUCCUGUUUGAGUUCAGUAAG          | 10069.299                             | 10069.269 | 2.95      | 14.5   |
|                                                                             | CGCCCUCAUCUCCUGUUUGAGUUCAGUAA           | 9724.251                              | n.f.      | n.f.      | n.f.   |
|                                                                             | CGCCCUCAUCUCCUGUUUGAGUUCAGUA            | 9395.199                              | 9395.185  | 1.47      | 2.8    |
|                                                                             | CGCCCUCAUCUCCUGUUUGAGUUCAGU             | 9066.146                              | 9066.162  | -1.73     | 25.5   |
|                                                                             | CGCCCUCAUCUCCUGUUUGAGUUCAG              | 8760.121                              | 8760.127  | -0.68     | 39.8   |
|                                                                             | CGCCCUCAUCUCCUGUUUGAGUUCCA              | 8415.074                              | 8415.092  | -2.19     | 40.0   |
|                                                                             | CGCCCUCAUCUCCUGUUUGAGUUC                | 8086.021                              | 8086.037  | -1.97     | 33.1   |
|                                                                             | CGCCCUCAUCUCCUGUUUGAGUUC                | 7780.980                              | 7780.985  | -0.67     | 4.1    |

**B**

| 6.7x10 <sup>-3</sup> μM RNase I <sub>(-DTT-EDTA)</sub> , +CaCl <sub>2</sub> |                                         | Calc.                                 | Found     | Error/ppm | % Rel. |
|-----------------------------------------------------------------------------|-----------------------------------------|---------------------------------------|-----------|-----------|--------|
| <b>RNA top strand</b>                                                       | 5'-GGGAGUAGAGGGACAAACUCAAGGUCAUUCGCA-3' | 10713.518                             | n.f.      | n.f.      | n.f.   |
| Top 5'>p frags                                                              | GGGAGUAGAGGGACAAACUCAAGGUCAUUCGC>p      | 10446.421                             | n.f.      | n.f.      | n.f.   |
|                                                                             | GGGAGUAGAGGGACAAACUCAAGGUCAUUCG>p       | 10141.380                             | n.f.      | n.f.      | n.f.   |
|                                                                             | GGGAGUAGAGGGACAAACUCAAGGUCAUUC>p        | 9796.333                              | n.f.      | n.f.      | n.f.   |
|                                                                             | GGGAGUAGAGGGACAAACUCAAGGUCAUU>p         | 9491.291                              | n.f.      | n.f.      | n.f.   |
|                                                                             | GGGAGUAGAGGGACAAACUCAAGGUCAU>p          | 9185.266                              | n.f.      | n.f.      | n.f.   |
|                                                                             | GGGAGUAGAGGGACAAACUCAAGGUCA>p           | 8879.241                              | n.f.      | n.f.      | n.f.   |
|                                                                             | GGGAGUAGAGGGACAAACUCAAGGUC>p            | 8550.188                              | n.f.      | n.f.      | n.f.   |
|                                                                             | GGGAGUAGAGGGACAAACUCAAGGU>p             | 8245.147                              | 8245.126  | 2.52      | 28.3   |
|                                                                             | GGGAGUAGAGGGACAAACUCAAGG>p              | 7939.122                              | 7939.138  | -2.08     | 100    |
|                                                                             | <b>RNA bottom strand</b>                | 3'-CGCCCUCAUCUCCUGUUUGAGUUCAGUAAGC-5' | 10374.340 | 10374.373 | -3.18  |
| Bottom 3' frags                                                             | CGCCCUCAUCUCCUGUUUGAGUUCAGUAAG          | 10069.299                             | n.f.      | n.f.      | n.f.   |
|                                                                             | CGCCCUCAUCUCCUGUUUGAGUUCAGUAA           | 9724.251                              | n.f.      | n.f.      | n.f.   |
|                                                                             | CGCCCUCAUCUCCUGUUUGAGUUCAGUA            | 9395.199                              | n.f.      | n.f.      | n.f.   |
|                                                                             | CGCCCUCAUCUCCUGUUUGAGUUCAGU             | 9066.146                              | n.f.      | n.f.      | n.f.   |
|                                                                             | CGCCCUCAUCUCCUGUUUGAGUUCAG              | 8760.121                              | 8760.140  | -2.17     | 2.9    |
|                                                                             | CGCCCUCAUCUCCUGUUUGAGUUCCA              | 8415.074                              | 8415.084  | -1.24     | 25.6   |
|                                                                             | CGCCCUCAUCUCCUGUUUGAGUUC                | 8086.021                              | 8086.037  | -1.97     | 45.1   |
|                                                                             | CGCCCUCAUCUCCUGUUUGAGUUC                | 7780.980                              | 7780.962  | 2.29      | 4.2    |

**Table S4**

| Substrate | Ca <sup>2+</sup> | v <sub>max</sub> (mM • min <sup>-1</sup> ) | [RNase I] mM          | k <sub>cat</sub> (min <sup>-1</sup> ) |
|-----------|------------------|--------------------------------------------|-----------------------|---------------------------------------|
| dsRNA     | +                | 0.36                                       | 1.34x10 <sup>-3</sup> | 2.68 x10 <sup>2</sup>                 |
| dsRNA     | -                | 0.02                                       | 6.70x10 <sup>-3</sup> | 3.0                                   |
| ssRNA     | +                | 0.42                                       | 6.70x10 <sup>-4</sup> | 6.27 x10 <sup>2</sup>                 |
| ssRNA     | -                | 0.45                                       | 6.70x10 <sup>-4</sup> | 6.71 x10 <sup>2</sup>                 |
